# Supplementary material for: Ca2+-dependent release of synaptotagmin-1 from the SNARE complex on phosphatidylinositol 4,5-bisphosphate-containing membranes
Source: eLife. 2020 Aug 18;9:e57154. doi: 10.7554/eLife.57154 (PMC7498268; doi:10.7554/eLife.57154)
Supplement: Figure 5—source data 1. [file elife-57154-fig5-data1.xlsx]

## Sheet: Fig. 5 C
Fig. 5 C
x: ND/CisSC-ND (nM)	y: FRET
	cisSC-ND Ca2+ 125mM KCl	ND Ca2+ 125mM KCl	cisSC-ND EGTA 50mM KCl	ND EGTA 50mM KCl
0	0
9.375	0.181265
18.75	0.31695
26.25	0.46206
37.5	0.545571
37.5	0.520638
56.25	0.64907
75	0.70975
150	0.80677
187.5	0.843387
375	0.848181
1500	0.873071
3000	0.88
0		0
37.5		0.162981
75		0.30304
150		0.449986
187.5		0.586629
225		0.558842
375		0.69541
750		0.80498
1500		0.851305
3000		0.85
0			0
35.75			0.150524
71.5			0.282962
178.75			0.515169
357.5			0.643823
3575			0.813235
715			0.703704
7150			0.857516
14300			0.901025
0				0
3575				0.231358
7150				0.442856
14300				0.680019
35750				0.922507
64350				0.962754

## Sheet: Fig. 5 D
Fig. 5 D
x: cisSC-ND/transSC-ND (nM)	y: FRET
	cisSC-ND	transSC-ND
0	0
14.04	0.119998
14.04	0.103946
28.08	0.161468
28.08	0.1149
42.12	0.201808
56.16	0.254066
70.2	0.315818
84.24	0.369645
112.32	0.464134
140.4	0.567847
210.6	0.67566
280.8	0.706635
351	0.761091
421.2	0.766061
561.6	0.785869
702	0.809696
982.8	0.821892
1263.6	0.83524
1684.8	0.834988
0		0
13.725		0.0351
27.45		0.098749
41.175		0.138292
54.9		0.190833
68.625		0.224319
82.35		0.276044
109.8		0.35395
137.25		0.436351
205.875		0.534286
274.5		0.565496
343.125		0.620847
411.75		0.66785
549		0.686403
686.25		0.708131
960.75		0.72396
1235.25		0.726584
1647		0.740077

## Sheet: Fig. 5 E
Fig. 5 E
x: cisSC-ND(nM)	y: FRET
	16C	34C	76C
0	0
29.8	0.120038
59.6	0.211911
89.4	0.264033
119.2	0.332142
149	0.424287
298	0.561812
447	0.624
596	0.681676
596	0.664466
745	0.642841
894	0.658813
1192	0.685837
1490	0.675788
2235	0.680683
0		0
32.6		0.158773
65.2		0.314595
97.8		0.403855
130.4		0.539713
163		0.572202
163		0.561738
326		0.743318
489		0.795824
652		0.810839
815		0.831283
978		0.841307
1304		0.858178
1630		0.876606
2445		0.831549
0			0
23.2			0.151526
46.4			0.290168
69.6			0.376443
92.8			0.488597
116			0.54779
232			0.733832
348			0.797711
464			0.815923
580			0.843668
696			0.848976
928			0.856464
1160			0.865291
1740			0.875718

## Sheet: Fig. 5 F
Fig. 5 F
x: cisSC-ND(nM)	y: FRET
	cisSC-ND Ca2+ +CpxFL	cisSC-ND Ca2+
0	0
30	0.221878
60	0.378216
90	0.459223
120	0.520324
210	0.645932
300	0.701599
600	0.758559
1200	0.796275
2400	0.810818
4800	0.820858
0		0
30		0.207241
60		0.367489
90		0.468876
120		0.558119
210		0.691599
300		0.776798
600		0.849345
1200		0.874843
2400		0.900259
4800		0.903105

## Sheet: Fig. 5 G
Fig. 5 G
x: ND/cisSC-ND(nM)	y: FRET
	cisSC-ND 50mM KCl	ND 50mM KCl	cisSC-ND 125mM KCl	ND 125mM KCl
0	0
4.8825	0.12044
19.53	0.237583
34.1775	0.367144
48.825	0.457557
73.2375	0.5671
97.65	0.624322
195.3	0.723028
488.25	0.79535
1953	0.843637
3906	0.866217
0		0
48.825		0.129319
97.65		0.236755
195.3		0.374195
341.775		0.519067
488.25		0.615619
976.5		0.706714
1953		0.809388
3906		0.856119
17577		0.942025
0			0
102.975			0.212695
205.95			0.318332
514.875			0.510887
1029.75			0.630835
2059.5			0.735956
2059.5			0.718889
0				0
1029.75				0.187443
2059.5				0.346084
2059.5				0.320704
4119				0.512487
6178.5				0.637937
8238				0.716169

## Sheet: Fig. 5 H
Fig. 5 H
x: ND/cisSC-ND(nM)	y: FRET
	ND 15%PS	cisSC-ND 15%PS	ND 10%PS	cisSC-ND 15%PS
0	0
6.169	0.095749
9.2535	0.216122
15.4225	0.294003
18.507	0.351696
24.676	0.440356
30.845	0.564481
38.5562	0.632393
46.2675	0.715269
61.69	0.809348
154.225	0.85924
308.45	0.86805
616.9	0.869646
0		0
3.0845		0.118292
6.169		0.242252
9.2535		0.324304
12.338		0.422806
15.4225		0.54157
20.0493		0.608304
24.676		0.693473
30.845		0.844024
61.69		0.870269
154.225		0.882743
308.45		0.884806
616.9		0.88
0			0
5.04875			0.067365
10.0975			0.15778
15.1463			0.265657
20.195			0.301132
25.2437			0.37919
30.2925			0.42889
40.39			0.554454
50.4875			0.630992
75.7313			0.765718
100.975			0.838842
100.975			0.805875
504.875			0.860846
1009.75			0.871229
0				0
5.04875				0.129676
10.0975				0.250999
15.1463				0.350772
20.195				0.454137
25.2437				0.525269
30.2925				0.604446
40.39				0.696471
50.4875				0.758116
75.7313				0.831262
100.975				0.860861
100.975				0.846109
504.875				0.895236
1009.75				0.900732
