# Supplementary material for: Ca2+-dependent release of synaptotagmin-1 from the SNARE complex on phosphatidylinositol 4,5-bisphosphate-containing membranes
Source: eLife. 2020 Aug 18;9:e57154. doi: 10.7554/eLife.57154 (PMC7498268; doi:10.7554/eLife.57154)
Supplement: Figure 6—figure supplement 3—source data 1. [file elife-57154-fig6-figsupp3-data1.xlsx]

## Sheet: Fig. 6 S3 A
Fig. 6 S3 A
x: ND (nM)	y: FRET
	WT	RQRQ	KEKE	REKE	REKERQRQ
0	0
1029.75	0.187443
2059.5	0.346084
2059.5	0.320704
4119	0.512487
6178.5	0.637937
8238	0.716169
0		0
514.875		0.028547
1029.75		0.082949
2059.5		0.207611
4119		0.404615
8238		0.629507
0			0
2059.5			0.085954
6178.5			0.35355
10297.5			0.541513
16476			0.693538
0				0
2059.5				0.115504
6178.5				0.37067
10297.5				0.546434
16476				0.71775
0					0
2059.5					0.108726
6178.5					0.345425
10297.5					0.536436
16476					0.699411

## Sheet: Fig. 6 S3 B
Fig. 6 S3 B
x: cisSC-ND (nM)	y: FRET
	WT	RQRQ	KEKE	REKE	REKERQRQ
0	0
102.975	0.212695
205.95	0.318332
514.875	0.510887
1029.75	0.630835
2059.5	0.735956
2059.5	0.718889
0		0
514.875		0.111573
1029.75		0.189412
2059.5		0.366868
4119		0.57457
8238		0.76614
0			0
2059.5			0.171835
4119			0.346323
6178.5			0.476047
10297.5			0.644106
14416.5			0.771524
0				0
2059.5				0.215436
4119				0.385124
6178.5				0.513863
10297.5				0.688191
14416.5				0.798876
0					0
10297.5					0.604811
14416.5					0.732444
2059.5					0.133317
4119					0.312168
6178.5					0.418129
