# Supplementary material for: Ca2+-dependent release of synaptotagmin-1 from the SNARE complex on phosphatidylinositol 4,5-bisphosphate-containing membranes
Source: eLife. 2020 Aug 18;9:e57154. doi: 10.7554/eLife.57154 (PMC7498268; doi:10.7554/eLife.57154)
Supplement: Figure 6—figure supplement 6—source data 1. [file elife-57154-fig6-figsupp6-data1.xlsx]

## Sheet: Fig. 6 S6 A
Fig. 6 S6 A
x: ND(nM)	y: FRET
	WT	RQRQ	KEKE	REKE	REKERQRQ
0	0
14.02	0.22516
21.03	0.340547
28.04	0.468568
35.05	0.68782
35.05	0.535435
52.575	0.823961
70.1	0.854281
140.2	0.879014
350.5	0.86834
701	0.87747
0		0
4.37		0.139632
8.74		0.228226
13.11		0.305763
17.48		0.389924
26.22		0.523193
34.96		0.655238
43.7		0.752548
52.44		0.820885
87.4		0.883417
174.8		0.890527
349.6		0.893887
0			0
8.74			0.140021
17.48			0.270089
26.22			0.367411
34.96			0.469485
52.44			0.575503
87.4			0.68862
174.8			0.734765
349.6			0.776648
874			0.82572
1748			0.837468
0				0
34.96				0.124734
61.18				0.224674
87.4				0.342322
174.8				0.476375
262.2				0.56561
1748				0.836611
349.6				0.638385
3496				0.876564
611.8				0.715559
874				0.781067
0					0
26.22					0.129227
52.44					0.195383
87.4					0.309051
131.1					0.415427
174.8					0.506516
262.2					0.557324
1748					0.842951
349.6					0.654733
3496					0.882159
611.8					0.714595
874					0.795845

## Sheet: Fig. 6 S6 B
Fig. 6 S6 B
x: cisSC-ND(nM)	y: FRET
	WT	RQRQ	KEKE	REKE	REKERQRQ
0	0
3.505	0.070152
5.2575	0.101796
7.01	0.257029
10.515	0.247621
14.02	0.354445
21.03	0.485067
28.04	0.603708
35.05	0.749299
70.1	0.863056
140.2	0.890212
350.5	0.899607
0		0
3.505		0.147106
4.206		0.186254
7.01		0.236451
14.02		0.387527
21.03		0.487018
28.04		0.593032
35.05		0.708463
42.06		0.766263
52.575		0.837097
70.1		0.861488
105.15		0.885062
140.2		0.88994
350.5		0.905771
0			0
7.01			0.107372
14.02			0.229656
24.535			0.362853
35.05			0.507583
52.575			0.613617
70.1			0.697111
140.2			0.7753
350.5			0.852796
701			0.864705
1402			0.887027
0				0
17.525				0.192444
35.05				0.307563
52.575				0.429676
70.1				0.511664
105.15				0.61993
350.5				0.829398
701				0.853918
1402				0.885625
0					0
35.05					0.153485
70.1					0.231362
140.2					0.355801
210.3					0.470318
350.5					0.607685
701					0.725907
1402					0.808653
2804					0.86479
