# Supplementary material for: Ca2+-dependent release of synaptotagmin-1 from the SNARE complex on phosphatidylinositol 4,5-bisphosphate-containing membranes
Source: eLife. 2020 Aug 18;9:e57154. doi: 10.7554/eLife.57154 (PMC7498268; doi:10.7554/eLife.57154)
Supplement: Figure 6—source data 1. [file elife-57154-fig6-data1.xlsx]

## Sheet: Fig. 6 A
Fig. 6 A
x: ND (nM)	y: FRET
	WT	RQRQ	REKE	KEKE	REKERQRQ
0	0
3575	0.231358
7150	0.442856
14300	0.680019
35750	0.922507
64350	0.962754
0		0
3575		0.17417
7150		0.35997
14300		0.586215
35750		0.877461
64350		0.952143
0			0
3575			0.169802
7150			0.328576
14300			0.571961
35750			0.865126
64350			0.950071
0				0
3575				0.136663
7150				0.307849
14300				0.550761
35750				0.85173
0					0
3575					0.142833
7150					0.346561
14300					0.542798
35750					0.847133

## Sheet: Fig. 6 B
Fig. 6 B
x: cisSC-ND (nM)	y: FRET
	WT	RQRQ	REKE	KEKE	REKERQRQ
0	0
35.75	0.150524
71.5	0.282962
178.75	0.515169
357.5	0.643823
715	0.703704
3575	0.813235
7150	0.857516
14300	0.901025
0		0
357.5		0.155847
715		0.237573
1787.5		0.414818
3575		0.552926
10725		0.710729
14300		0.841549
0			0
1787.5			0.170041
3575			0.328272
7150			0.532588
14300			0.746766
35750			0.929639
0				0
3575				0.219518
7150				0.42356
14300				0.669884
35750				0.907323
0					0
3575					0.165914
7150					0.367351
14300					0.592906
35750					0.879813

## Sheet: Fig. 6 C
Fig. 6 C
x: ND (nM)	y: FRET
	WT	RQRQ	REKE	KEKE	REKERQRQ
0	0
48.825	0.129319
97.65	0.236755
195.3	0.374195
341.775	0.519067
488.25	0.615619
976.5	0.706714
1953	0.809388
3906	0.856119
17577	0.942025
0		0
195.3		0.117654
341.775		0.215593
488.25		0.307144
976.5		0.444489
1953		0.607623
3906		0.739673
7812		0.849894
17577		0.922867
0			0
488.25			0.033899
1953			0.094542
3906			0.174143
5859			0.304181
7812			0.406311
11718			0.545118
17577			0.680038
0				0
488.25				0.009996
1953				0.054233
3906				0.129291
5859				0.268345
7812				0.372214
11718				0.477782
15624				0.618706
17577				0.67075
0					0
488.25					0.009785
1953					0.067343
3906					0.176405
5859					0.271485
7812					0.363399
11718					0.505633
17577					0.654944

## Sheet: Fig. 6 D
Fig. 6 D
x: cisSC-ND (nM)	y: FRET
	WT	RQRQ	REKE	KEKE	REKERQRQ
0	0
4.8825	0.12044
19.53	0.237583
34.1775	0.367144
48.825	0.457557
73.2375	0.5671
97.65	0.624322
195.3	0.723028
1953	0.843637
3906	0.866217
488.25	0.79535
0		0
97.65		0.105101
976.5		0.593539
195.3		0.22963
1953		0.684902
292.95		0.283647
3906		0.791156
488.25		0.430961
488.25		0.393972
7812		0.872314
0			0
976.5			0.119408
11718			0.785618
17577			0.84822
1953			0.251185
1953			0.240947
3906			0.39741
488.25			0.054463
5859			0.551708
7812			0.659193
0				0
976.5				0.079832
11718				0.742016
17577				0.845642
1953				0.20154
1953				0.119523
2929.5				0.31191
3906				0.3741
488.25				0.017622
5859				0.536085
7812				0.617167
0					0
11718					0.630054
17577					0.714594
2929.5					0.186533
3906					0.252024
488.25					0.008224
5859					0.388913
7812					0.478552
1953					0.06981

## Sheet: Fig. 6 E
Fig. 6 E
x: ND (nM)	y: FRET
	WT	RQRQ	REKE	KEKE	REKERQRQ
0	0
18.25	0.172967
36.5	0.213971
54.75	0.322674
73	0.34447
91.25	0.451887
136.875	0.54772
182.5	0.639789
365	0.764902
912.5	0.872894
1825	0.895037
3650	0.916216
0		0
18.25		0.109159
36.5		0.190132
54.75		0.255619
73		0.339001
91.25		0.424628
136.875		0.530558
182.5		0.600986
365		0.752821
912.5		0.866719
1825		0.898348
3650		0.920278
0			0
91.25			0.14192
182.5			0.266588
365			0.385093
547.5			0.490288
730			0.549801
912.5			0.623094
912.5			0.590621
1825			0.73235
3650			0.808251
7300			0.840974
0				0
91.25				0.20463
91.25				0.103943
182.5				0.343283
365				0.480306
365				0.474722
547.5				0.559792
730				0.634554
912.5				0.657146
912.5				0.653391
1825				0.740381
3650				0.80904
7300				0.846679
18250				0.899823
0					0
91.25					0.145188
182.5					0.267565
365					0.393834
638.75					0.537383
912.5					0.606555
1825					0.717848
3650					0.785646
7300					0.844787
18250					0.892393

## Sheet: Fig. 6 F
Fig. 6 F
x: cisSC-ND (nM)	y: FRET
	WT	RQRQ	REKE	KEKE	REKERQRQ
0	0
9.125	0.171545
18.25	0.278531
27.375	0.37872
36.5	0.482116
54.75	0.582372
73	0.666023
91.25	0.734029
182.5	0.829204
365	0.858684
912.5	0.878367
1825	0.881231
3650	0.882835
0		0
9.125		0.106473
18.25		0.209298
36.5		0.317259
54.75		0.408253
73		0.482234
91.25		0.576463
91.25		0.52198
136.875		0.667017
182.5		0.713443
365		0.795211
547.5		0.834097
730		0.853439
912.5		0.868417
1825		0.88512
3650		0.89281
0			0
36.5			0.145459
54.75			0.207981
73			0.290717
91.25			0.370557
136.875			0.454392
182.5			0.526652
273.75			0.639784
365			0.692846
912.5			0.814882
1825			0.859498
3650			0.882058
7300			0.910765
0				0
18.25				0.09155
36.5				0.171608
54.75				0.209636
73				0.286582
91.25				0.366685
136.875				0.448423
182.5				0.515537
273.75				0.608065
365				0.650266
365				0.644951
638.75				0.733966
912.5				0.777835
1825				0.83185
3650				0.865517
7300				0.895285
0					0
91.25					0.17167
136.875					0.298388
182.5					0.342762
273.75					0.390206
365					0.483083
547.5					0.508024
730					0.608847
912.5					0.66042
1825					0.755624
3650					0.826212
7300					0.878972

## Sheet: Fig. 6 G
Fig. 6 G
x: ND (nM)	y: FRET
	WT	RQRQ	REKE	KEKE	REKERQRQ
0	0
5.04875	0.067365
10.0975	0.15778
15.1463	0.265657
20.195	0.301132
25.2437	0.37919
30.2925	0.42889
40.39	0.554454
50.4875	0.630992
75.7313	0.765718
100.975	0.838842
100.975	0.805875
504.875	0.860846
1009.75	0.871229
0		0
5.04875		0.097567
10.0975		0.113892
15.1463		0.202812
20.195		0.273271
30.2925		0.366196
40.39		0.518123
40.39		0.508794
50.4875		0.599022
75.7313		0.731677
100.975		0.833292
100.975		0.78747
504.875		0.876093
1009.75		0.884464
0			0
100.975			0.087215
201.95			0.124185
403.9			0.196885
757.312			0.349267
1009.75			0.39417
1514.62			0.48698
2019.5			0.560568
3029.25			0.660502
4039			0.733929
8078			0.839216
0				0
20.195				0.130332
40.39				0.294611
50.4875				0.438614
100.975				0.584256
201.95				0.634867
504.875				0.718078
504.875				0.701439
807.8				0.878609
1009.75				0.744122
4039				0.82869
0					0
252.438					0.176284
504.875					0.269268
1009.75					0.42009
2019.5					0.55151
4039					0.717146
8078					0.842145

## Sheet: Fig. 6 H
Fig. 6 H
x: cisSC-ND (nM)	y: FRET
	WT	RQRQ	REKE	KEKE	REKERQRQ
0	0
5.04875	0.129676
10.0975	0.250999
15.1463	0.350772
20.195	0.454137
25.2437	0.525269
30.2925	0.604446
40.39	0.696471
50.4875	0.758116
75.7313	0.831262
100.975	0.860861
100.975	0.846109
504.875	0.895236
1009.75	0.900732
0		0
5.04875		0.081306
10.0975		0.14232
15.1463		0.2231
20.195		0.326482
30.2925		0.410996
40.39		0.544261
40.39		0.511407
50.4875		0.591527
75.7313		0.689536
100.975		0.814007
100.975		0.777894
504.875		0.879654
1009.75		0.88847
0			0
50.4875			0.136594
100.975			0.235506
201.95			0.383824
353.413			0.511221
504.875			0.604915
504.875			0.57814
1009.75			0.739474
2019.5			0.803756
4039			0.852569
0				0
10.0975				0.085749
20.195				0.20463
35.3413				0.333667
50.4875				0.462069
50.4875				0.359645
100.975				0.620225
201.95				0.691976
504.875				0.790047
1009.75				0.818035
2019.5				0.857985
0					0
252.438					0.15644
504.875					0.289555
1009.75					0.418475
2019.5					0.574718
4039					0.742242
8078					0.850544
