# Supplementary material for: Ca2+-dependent release of synaptotagmin-1 from the SNARE complex on phosphatidylinositol 4,5-bisphosphate-containing membranes
Source: eLife. 2020 Aug 18;9:e57154. doi: 10.7554/eLife.57154 (PMC7498268; doi:10.7554/eLife.57154)
Supplement: Figure 7—source data 1. [file elife-57154-fig7-data1.xlsx]

## Sheet: Fig. 7 A
Fig. 7 A
x: ND/cisSC-ND (nM)	y: FRET
	WT cisSC-ND	WT ND	EAYW cisSC-ND	EAYW ND
0	0
102.975	0.212695
205.95	0.318332
514.875	0.510887
1029.75	0.630835
2059.5	0.735956
2059.5	0.718889
0		0
1029.75		0.187443
2059.5		0.346084
2059.5		0.320704
4119		0.512487
6178.5		0.637937
8238		0.716169
0			0
25.7437			0.230272
51.4875			0.341765
102.975			0.462925
205.95			0.61181
514.875			0.726286
1029.75			0.770532
2059.5			0.812346
0				0
514.875				0.121023
1029.75				0.220794
2059.5				0.352899
4119				0.559472
8238				0.752805

## Sheet: Fig. 7 B
Fig. 7 B
x: ND/cisSC-ND (nM)	y: FRET
	WT cisSC-ND	WT ND	EAYW cisSC-ND	EAYW ND
0	0
5	0.124421
10	0.232346
15	0.267106
20	0.334045
25	0.414147
37.5	0.54572
50	0.618232
100	0.752876
250	0.827757
500	0.824643
1000	0.833487
2000	0.849454
0		0
25		0.151718
50		0.250625
100		0.406256
150		0.516572
200		0.586897
300		0.696078
500		0.795826
1000		0.85483
0			0
5			0.135126
10			0.231897
15			0.3174
15			0.307549
20			0.395023
20			0.356936
25			0.487114
37.5			0.571019
50			0.671484
75			0.749025
100			0.78631
250			0.805522
500			0.815614
1000			0.806557
2000			0.824758
4000			0.852157
0				0
25				0.139439
50				0.261996
100				0.403147
100				0.392985
150				0.475739
200				0.577532
300				0.671913
500				0.764522
1000				0.828
1500				0.842988

## Sheet: Fig. 7 C
Fig. 7 C
x: ND/cisSC-ND (nM)	y: FRET
	WT cisSC-ND	WT ND	EAYW cisSC-ND	EAYW ND
0	0
1.5	0.098954
3	0.174362
3	0.170914
4.5	0.283531
6	0.332449
9	0.425023
12	0.526765
15	0.616575
18	0.707146
22.5	0.791153
30	0.87804
60	0.889566
150	0.88543
300	0.89
0		0
1.5		0.089906
3		0.081244
6		0.144625
10.5		0.210513
15		0.334213
22.5		0.46355
30		0.553599
37.5		0.647745
45		0.740678
60		0.802657
150		0.864762
300		0.870834
600		0.864
0			0
1.5			0.139883
3			0.230103
6			0.35587
9			0.504542
12			0.565891
15			0.667628
22.5			0.823243
30			0.876285
60			0.88941
150			0.900174
300			0.891979
0				0
3				0.089519
6				0.145488
12				0.259662
15				0.326679
22.5				0.441264
30				0.527385
45				0.671829
60				0.74806
150				0.844266
300				0.856188
600				0.857

## Sheet: Fig. 7 D
Fig. 7 D
x: ND/cisSC-ND (nM)	y: FRET
	WT cisSC-ND	WT ND	EAYW cisSC-ND	EAYW ND
0	0
4.24	0.071086
8.48	0.15238
16.96	0.300686
25.44	0.420374
42.4	0.594295
63.6	0.782655
84.8	0.829256
424	0.87
0		0
16.96		0.171335
33.92		0.379885
50.88		0.462376
67.84		0.622906
84.8		0.76773
424		0.875152
0			0
4.24			0.095442
8.48			0.186463
16.96			0.344297
25.44			0.468299
42.4			0.644492
63.6			0.80225
84.8			0.84287
424			0.87
0				0
16.96				0.204503
33.92				0.341094
50.88				0.460367
67.84				0.598268
84.8				0.7397
424				0.873407
