# Supplementary material for: Ca2+-dependent release of synaptotagmin-1 from the SNARE complex on phosphatidylinositol 4,5-bisphosphate-containing membranes
Source: eLife. 2020 Aug 18;9:e57154. doi: 10.7554/eLife.57154 (PMC7498268; doi:10.7554/eLife.57154)
Supplement: Figure 8—figure supplement 1—source data 1. [file elife-57154-fig8-figsupp1-data1.xlsx]

## Sheet: Fig. 8 S1 A
Fig. 8 S1 A
x: mcc/solubleSC (nM)	y: FRET
	mcc	solubleSC
0	0
3375	0.192291
6750	0.307412
13500	0.445602
27000	0.624032
40500	0.692673
81000	0.776805
0		0
1250		0.196843
2500		0.296473
5000		0.403886
10000		0.566258
15000		0.607935
30000		0.706725

## Sheet: Fig. 8 S1 B
Fig. 8 S1 B
x: mcc/solubleSC (nM)	y: FRET
	mcc	solubleSC
0	0
337.5	0.128646
675	0.25673
1350	0.38909
2025	0.474871
3375	0.624076
6750	0.716716
20250	0.809323
40500	0.856697
81000	0.878554
0		0
125		0.167599
250		0.291638
500		0.411706
750		0.479371
1250		0.622929
2500		0.681316
5000		0.71993
10000		0.771098
15000		0.791314

## Sheet: Fig. 8 S1 C
Fig. 8 S1 C
x: mcc (nM)	y: FRET
	WT	EYAW	REKE	RQRQ
0	0
3375	0.192291
6750	0.307412
13500	0.445602
27000	0.624032
40500	0.692673
81000	0.776805
0		0
1687.5		0.194052
3375		0.279525
6750		0.404225
13500		0.551922
27000		0.710805
40500		0.778085
81000		0.832831
0			0
27000			0.239859
54000			0.409598
81000			0.535065
0				0
13500				0.322944
27000				0.443838
81000				0.6789

## Sheet: Fig. 8 S1 D
Fig. 8 S1 D
x: mcc (nM)	y: FRET
	WT	EYAW	REKE	RQRQ
0	0
337.5	0.128646
675	0.25673
1350	0.38909
2025	0.474871
3375	0.624076
6750	0.716716
20250	0.809323
40500	0.856697
81000	0.878554
0		0
337.5		0.237262
675		0.38153
1350		0.560126
2025		0.642007
3375		0.734521
13500		0.854631
40500		0.890617
0			0
1350			0.086995
3375			0.089221
6750			0.235071
13500			0.338173
27000			0.486658
54000			0.654298
0				0
675				0.201529
1350				0.309055
3375				0.523585
6750				0.63012
13500				0.723929
40500				0.773499
