# Supplementary material for: Ca2+-dependent release of synaptotagmin-1 from the SNARE complex on phosphatidylinositol 4,5-bisphosphate-containing membranes
Source: eLife. 2020 Aug 18;9:e57154. doi: 10.7554/eLife.57154 (PMC7498268; doi:10.7554/eLife.57154)
Supplement: Figure 8—source data 1. [file elife-57154-fig8-data1.xlsx]

## Sheet: Fig. 8 A
Fig. 8 A
x: cisSC-ND/solubleSC (nM)	y: FRET
	cisSC-ND 15% PS 1% PIP2 84% PC	cisSC-ND 100% PC	solubleSC
0	0
180	0.163555
360	0.336182
630	0.476587
900	0.587655
1800	0.712608
3600	0.771638
7200	0.82353
0		0
220		0.084376
440		0.205277
440		0.257403
880		0.41529
880		0.434896
1320		0.559894
1760		0.641788
2640		0.666328
3520		0.753322
4400		0.744009
8800		0.844111
17600		0.883337
0			0
1250			0.196843
2500			0.296473
5000			0.403886
10000			0.566258
15000			0.607935
30000			0.706725

## Sheet: Fig. 8 B
Fig. 8 B
x: cisSC-ND/solubleSC (nM)	y: FRET
	cisSC-ND 15% PS 1% PIP2 84% PC	cisSC-ND 100% PC	solubleSC
0	0
9	0.055969
13.5	0.153099
18	0.206128
27	0.302662
36	0.385467
45	0.424864
90	0.389406
180	0.368212
360	0.379547
900	0.398442
0		0
44		0.167825
66		0.273217
88		0.425228
132		0.53564
220		0.691526
440		0.846061
880		0.885414
1760		0.90117
0			0
125			0.167599
250			0.291638
2500			0.681316
500			0.411706
5000			0.71993
750			0.479371
10000			0.771098
1250			0.622929
15000			0.791314

## Sheet: Fig. 8 C
Fig. 8 C
x: cisSC-ND (nM)	y: FRET
	WT	EAYW	REKE	RQRQ
0	0
180	0.163555
360	0.336182
630	0.476587
900	0.587655
1800	0.712608
3600	0.771638
7200	0.82353
0		0
45		0.178097
90		0.324881
180		0.487244
360		0.641175
720		0.755204
1800		0.823573
3600		0.862863
7200		0.877172
0			0
7200			0.136681
14400			0.362593
14400			0.357027
21600			0.477902
0				0
3600				0.170614
7200				0.341379
14400				0.543625

## Sheet: Fig. 8 D
Fig. 8 D
x: cisSC-ND (nM)	y: FRET
	WT	EAYW	REKE	RQRQ
0	0
9	0.055969
13.5	0.153099
18	0.206128
27	0.302662
36	0.385467
45	0.424864
90	0.389406
180	0.368212
360	0.379547
900	0.398442
0		0
4.5		0.073862
9		0.20265
18		0.357709
36		0.516445
90		0.567643
360		0.548931
720		0.546546
0			0
45			0.076298
90			0.220777
180			0.306375
1800			0.620246
360			0.432755
3600			0.640675
7200			0.66605
900			0.570922
0				0
18				0.052122
18				0.030879
27				0.103025
36				0.166615
36				0.16209
90				0.215251
90				0.197143
135				0.171987
180				0.142754
180				0.123836
360				0.098195
360				0.091543
900				0.07245
1800				0.088264

## Sheet: Fig. 8 E
Fig. 8 E
x: cisSC-ND (nM)	y: FRET
	WT	EAYW	REKE	RQRQ
0	0
220	0.084376
440	0.205277
440	0.257403
880	0.41529
880	0.434896
1320	0.559894
1760	0.641788
2640	0.666328
3520	0.753322
4400	0.744009
8800	0.844111
17600	0.883337
0		0
88		0.135819
176		0.329876
440		0.567864
880		0.71117
1760		0.795838
8800		0.891183
17600		0.907198
0			0
8800			0.18519
17600			0.374502
35200			0.593644
0				0
4400				0.126499
8800				0.302472
17600				0.516846
35200				0.697087

## Sheet: Fig. 8 F
Fig. 8 F
x: cisSC-ND (nM)	y: FRET
	WT	EAYW	REKE	RQRQ
0	0
44	0.167825
66	0.273217
88	0.425228
132	0.53564
220	0.691526
440	0.846061
880	0.885414
1760	0.90117
0		0
22		0.182917
33		0.263425
44		0.377174
66		0.496666
88		0.576446
176		0.755686
440		0.868579
880		0.87896
0			0
220			0.114203
440			0.235013
880			0.388463
1760			0.562445
3080			0.673755
4400			0.787607
8800			0.813668
17600			0.847694
0				0
110				0.095963
220				0.245313
440				0.436702
880				0.591201
1760				0.707475
4400				0.809693
8800				0.837688

## Sheet: Fig. 8 G
Fig. 8 G
x: solubleSC (nM)	y: FRET
	WT	EAYW	REKE	RQRQ
0	0
1250	0.196843
2500	0.296473
5000	0.403886
10000	0.566258
15000	0.607935
30000	0.706725
0		0
500		0.213405
1250		0.370396
2500		0.472198
5000		0.581285
10000		0.666129
30000		0.781153
0			0
10000			0.167073
15000			0.24695
45000			0.536033
0				0
5000				0.166005
10000				0.308413
15000				0.381967
20000				0.449648
30000				0.560443
35000				0.585325
45000				0.664929

## Sheet: Fig. 8 H
Fig. 8 H
x: solubleSC (nM)	y: FRET
	WT	EAYW	REKE	RQRQ
0	0
125	0.167599
250	0.291638
500	0.411706
750	0.479371
1250	0.622929
2500	0.681316
5000	0.71993
10000	0.771098
15000	0.791314
0		0
62.5		0.174941
125		0.303093
250		0.456845
500		0.557873
1250		0.699279
2500		0.745598
5000		0.770341
10000		0.791365
15000		0.802452
0			0
1250			0.16891
2500			0.294285
5000			0.406673
10000			0.508127
15000			0.554932
0				0
500				0.171352
1250				0.371867
2500				0.491168
5000				0.593372
10000				0.626851
15000				0.654554
