# Supplementary material for: Ca2+-dependent release of synaptotagmin-1 from the SNARE complex on phosphatidylinositol 4,5-bisphosphate-containing membranes
Source: eLife. 2020 Aug 18;9:e57154. doi: 10.7554/eLife.57154 (PMC7498268; doi:10.7554/eLife.57154)
Supplement: Figure 9—figure supplement 1—source data 1. [file elife-57154-fig9-figsupp1-data1.xlsx]

## Sheet: Sheet1
Fig. 9 S1 D
FRET
cisSC-ND	ND	cisSC-ND + Mg2+	ND + Mg2+	cisSC-ND + Mg2+ + ATP	ND + Mg2+ + ATP
0.702396	0.277318	0.596505	0.161236	0.50955	0.159125
0.702322	0.282382	0.605028	0.159505	0.511912	0.156212
0.699526	0.272597	0.591293	0.146029	0.495341	0.13717
