# Supplementary material for: Ca2+-dependent release of synaptotagmin-1 from the SNARE complex on phosphatidylinositol 4,5-bisphosphate-containing membranes
Source: eLife. 2020 Aug 18;9:e57154. doi: 10.7554/eLife.57154 (PMC7498268; doi:10.7554/eLife.57154)
Supplement: Figure 9—figure supplement 2—source data 1. [file elife-57154-fig9-figsupp2-data1.xlsx]

## Sheet: Sheet1
Fig. 9 S2 D
FRET
cisSC-ND	ND	cisSC-ND + Mg2+	ND + Mg2+	cisSC-ND + Mg2+ + ATP	ND + Mg2+ + ATP
0.741783	0.515401	0.587735	0.385988	0.335643	0.262181
0.732868	0.521881	0.588485	0.406119	0.334244	0.251916
0.710095	0.5111	0.577908	0.399561	0.326466	0.223468
