# Supplementary material for: Ca2+-dependent release of synaptotagmin-1 from the SNARE complex on phosphatidylinositol 4,5-bisphosphate-containing membranes
Source: eLife. 2020 Aug 18;9:e57154. doi: 10.7554/eLife.57154 (PMC7498268; doi:10.7554/eLife.57154)
Supplement: Figure 9—source data 1. [file elife-57154-fig9-data1.xlsx]

## Sheet: Fig. 9 A
Fig. 9 A
x: ND/cisSC-ND (nM)	y: FRET
	cisSC-ND WT	ND WT
0	0
397.5	0.063538
993.75	0.214894
1987.5	0.377401
3975	0.560422
7950	0.750782
15900	0.888054
0		0
993.75		0.044336
1987.5		0.15455
3975		0.310401
5962.5		0.470347
7950		0.573848
11925		0.73906
19875		0.883485

## Sheet: Fig. 9 B
Fig. 9 B
x: ND/cisSC-ND (nM)	y: FRET
	cisSC-ND WT	ND WT
0	0
6.62063	0.127509
13.2413	0.214362
26.4825	0.397046
39.7238	0.542578
52.965	0.651807
92.6887	0.789729
132.412	0.842383
264.825	0.872524
529.65	0.88455
0		0
9.9375		0.137493
19.875		0.270282
29.8125		0.362656
39.75		0.475295
59.625		0.624801
79.5		0.73806
99.375		0.800693
198.75		0.874238
993.75		0.887274

## Sheet: Fig. 9 C
Fig. 9 C
x: ND (nM)	y: FRET
	WT	EAYW	RQRQ	KEKE	REKE	REKERQRQ
0	0
993.75	0.044336
1987.5	0.15455
3975	0.310401
5962.5	0.470347
7950	0.573848
11925	0.73906
19875	0.883485
0		0
993.75		0.113947
1987.5		0.219903
3975		0.372989
5962.5		0.549852
7950		0.646842
11925		0.788631
19875		0.904877
0			0
993.75			0.049336
1987.5			0.149006
3975			0.280273
5962.5			0.436248
7950			0.527174
11925			0.693158
15900			0.785708
19875			0.846121
0				0
1987.5				0.107684
3975				0.27572
7950				0.468775
13912.5				0.660913
19875				0.786561
27825				0.874669
0					0
1987.5					0.120628
3975					0.257938
7950					0.456377
13912.5					0.66882
19875					0.786933
27825					0.871921
0						0
3975						0.224749
7950						0.447389
13912.5						0.678556
19875						0.803199
27825						0.853178

## Sheet: Fig. 9 D
Fig. 9 D
x: cisSC-ND (nM)	y: FRET
	WT	EAYW	RQRQ	KEKE	REKE	REKERQRQ
0	0
397.5	0.063538
993.75	0.214894
1987.5	0.377401
3975	0.560422
7950	0.750782
15900	0.888054
0		0
198.75		0.188665
397.5		0.296643
795		0.415419
993.75		0.507639
1987.5		0.638167
3975		0.745334
7950		0.8426
15900		0.92014
0			0
1987.5			0.182726
3975			0.362389
7950			0.559699
11925			0.712233
19875			0.857065
0				0
1987.5				0.148181
3975				0.288727
3975				0.271687
7950				0.495191
13912.5				0.699476
19875				0.811328
0					0
1987.5					0.144426
3975					0.309562
7950					0.521197
13912.5					0.721336
19875					0.838291
0						0
3975						0.228748
7950						0.477646
13912.5						0.664257
19875						0.781199
27825						0.866423

## Sheet: Fig. 9 E
Fig. 9 E
x: cisSC-ND (nM)	y: FRET
	cisSC-ND WT	cisSC-ND WT + 2X CpxFL
0	0
710.625	0.192746
1421.25	0.325385
2842.5	0.505983
5685	0.694008
11370	0.85213
0		0
710.625		0.158977
1421.25		0.291154
2842.5		0.465821
5685		0.674147
11370		0.832879

## Sheet: Fig. 9 F
Fig. 9 F
x: ND (nM)	y: FRET
	KEKE	REKE	WT
0	0
9.9375	0.023935
19.875	0.083337
39.75	0.250997
59.625	0.327691
79.5	0.432155
99.375	0.52572
198.75	0.616163
397.5	0.670342
993.75	0.759421
993.75	0.74329
1987.5	0.779569
7950	0.865652
0		0
198.75		0.108247
397.5		0.20473
695.625		0.340192
993.75		0.45476
993.75		0.429143
1987.5		0.587024
2981.25		0.685297
3975		0.737154
7950		0.840566
11925		0.889658
0			0
9.9375			0.137493
19.875			0.270282
29.8125			0.362656
39.75			0.475295
59.625			0.624801
79.5			0.73806
99.375			0.800693
198.75			0.874238
993.75			0.887274
