# Supplementary material for: Ca2+-dependent release of synaptotagmin-1 from the SNARE complex on phosphatidylinositol 4,5-bisphosphate-containing membranes
Source: eLife. 2020 Aug 18;9:e57154. doi: 10.7554/eLife.57154 (PMC7498268; doi:10.7554/eLife.57154)
Supplement: Supplementary file 1. — Most of the entries in the table correspond to the data shown in Figures 5–9 and associated figure supplements, as indicated in the second column. The first column shows whether the experiments were performed with WT C2AB* or C2AB* mutant E295A,Y338W (EAYW), R398Q,R399Q (RQRQ), R322E,K325E (REKE), K324E,K326E (KEKE) or R322E,K325E,R398Q,R399Q (REKERQRQ). The KDs, KD errors, Hill coefficients (h) and FRET efficiencies at saturating concentrations (Bmax) were calculated from fitting the data to the Hill equation described in Materials and methods. Note that Bmax values above one must be considered an artifact of the fit, as FRET efficiencies cannot be larger than 1. The three columns on the right describe the buffer conditions used, the composition of the NDs, cisSC-NDs or transSC-NDs, and where the FRET acceptor probe was placed. SNN indicates the SNAP-25 N-terminal SNARE motif. To show the reproducibility of the data, the results obtained in three independent sets of experiments performed with different preparations under the conditions of Figure 6G and H are listed. Statistical analysis of these data is presented in Figure 9—figure supplement 4. [file elife-57154-supp1.xlsx]

## Sheet: data
Summary of apparent KDs calculated from the titrations of C2AB* with NDs, cisSC-NDs, transSC-NDs and solubleSCs performed under various conditions. Most of the entries in the table correspond to the data shown in Figs. 5-9 and associated figure supplements, as indicated in the second column. The first column shows whether the experiments were performed with WT C2AB* or C2AB* mutant E295A,Y338W (E…
C2AB* version	Fig number	ND/CisSC/TransSC	Kd (nM)	Kd error	h	Bmax	Buffer	Lipid composition	Acceptor
WT	5C,6A, 6S1	ND	8750	366.15	1.407	1.032	50mM KCl 1mM EGTA	15%PS 80%PC 5%RhoPE	RhoPE
WT	5C,6B, 6S1	CisSC	140.9	12.42	1.04	0.8715	50mM KCl 1mM EGTA	15%PS 80%PC 5%RhoPE	RhoPE
WT	5C	ND	129.5	8.77	1.232	0.8834	125mM KCl 1mM Ca	15%PS 80%PC 5%RhoPE	RhoPE
WT	5C	CisSC	26.61	0.7353	1.369	0.8814	125mM KCl 1mM Ca	15%PS 80%PC 5%RhoPE	RhoPE
WT	5D	CisSC	96.14	5.126	1.377	0.8638	125mM KCl 1mM Ca	15%PS 85%PC	SNN 34C
WT	5D	TransSC	117.8	2.946	1.444	0.7587	125mM KCl 1mM Ca	15%PS 85%PC	SNN 34C
WT	5E	CisSC	116.4	6.6	1.425	0.7068	125mM KCl 1mM Ca	15%PS 85%PC	SNN 16C
WT	5E	CisSC	101	3.198	1.398	0.8748	125mM KCl 1mM Ca	15%PS 85%PC	SNN 34C
WT	5E	CisSC	81.34	1.871	1.373	0.8933	125mM KCl 1mM Ca	15%PS 85%PC	SNN 76C
WT	5F	CisSC	82.83	1.573	1.258	0.9126	125mM KCl 1mM Ca	15%PS 85%PC	SNN 34C
WT	5F	CisSC 2X CpxFL	72.2	1.309	1.151	0.8276	125mM KCl 1mM Ca	15%PS 85%PC	SNN 34C
WT	5F	CisSC	64.82	3.318	1.169	0.8996	50mM KCl 1mM EGTA	15%PS 85%PC	SNN 34C
WT	5F	CisSC 2X CpxFL	74.64	3.82	1.227	0.8314	50mM KCl 1mM EGTA	15%PS 85%PC	SNN 34C
WT	5G, 6S3, 7A	ND	4902	1102	1.027	1.137	125mM KCl 1mM EGTA	15%PS 1% PIP2 79%PC 5%RhoPE	RhoPE
WT	5G, 6S3, 7A	CisSC	365.8	38.86	0.9185	0.8763	125mM KCl 1mM EGTA	15%PS 1% PIP2 79%PC 5%RhoPE	RhoPE
WT	5G, 6C, 6S2	ND	285.9	15.75	0.9935	0.9376	50mM KCl 1mM EGTA	15%PS 1% PIP2 79%PC 5%RhoPE	RhoPE
WT	5G, 6D, 6S2	CisSC	43.05	2.404	1.06	0.8663	50mM KCl 1mM EGTA	15%PS 1% PIP2 79%PC 5%RhoPE	RhoPE
WT	5H	ND	22.43	1.049	1.734	0.8903	125mM KCl 1mM Ca	15%PS 1% PIP2 79%PC 5%RhoPE	RhoPE
WT	5H	CisSC	12.15	0.667	1.77	0.9022	125mM KCl 1mM Ca	15%PS 1% PIP2 79%PC 5%RhoPE	RhoPE
WT	5H, 6G, 6S5	ND	28.99	1.313	1.652	0.8935	125mM KCl 1mM Ca	10%PS 1% PIP2 84%PC 5%RhoPE	RhoPE
WT	5H, 6H, 6S5	CisSC	19.69	0.5325	1.558	0.9146	125mM KCl 1mM Ca	10%PS 1% PIP2 84%PC 5%RhoPE	RhoPE
WT	5C,6A, 6S1	ND	8750	366.15	1.407	1.032	50mM KCl 1mM EGTA	15%PS 80%PC 5%RhoPE	RhoPE
KEKE	6A, 6S1	ND	13620	294.7	1.421	1.067	50mM KCl 1mM EGTA	15%PS 80%PC 5%RhoPE	RhoPE
REKE	6A, 6S1	ND	12608	593.9	1.365	1.06	50mM KCl 1mM EGTA	15%PS 80%PC 5%RhoPE	RhoPE
REKERQRQ	6A, 6S1	ND	13925	3075	1.299	1.092	50mM KCl 1mM EGTA	15%PS 80%PC 5%RhoPE	RhoPE
RQRQ	6A, 6S1	ND	11773	597.1	1.362	1.055	50mM KCl 1mM EGTA	15%PS 80%PC 5%RhoPE	RhoPE
WT	5C,6B, 6S1	CisSC	140.9	12.42	1.04	0.8715	50mM KCl 1mM EGTA	15%PS 80%PC 5%RhoPE	RhoPE
KEKE	6B, 6S1	CisSC	9623	51.27	1.359	1.06	50mM KCl 1mM EGTA	15%PS 80%PC 5%RhoPE	RhoPE
REKE	6B, 6S1	CisSC	7037	115.2	1.204	1.062	50mM KCl 1mM EGTA	15%PS 80%PC 5%RhoPE	RhoPE
REKERQRQ	6B, 6S1	CisSC	12207	1131	1.345	1.085	50mM KCl 1mM EGTA	15%PS 80%PC 5%RhoPE	RhoPE
RQRQ	6B, 6S1	CisSC	3524	1944	0.7666	1.081	50mM KCl 1mM EGTA	15%PS 80%PC 5%RhoPE	RhoPE
WT	5G, 6C, 6S2	ND	285.85	15.75	0.9935	0.9376	50mM KCl 1mM EGTA	15%PS 1% PIP2 79%PC 5%RhoPE	RhoPE
KEKE	6C, 6S2	ND	11464	2699	1.598	0.9955	50mM KCl 1mM EGTA	15%PS 1% PIP2 79%PC 5%RhoPE	RhoPE
REKE	6C, 6S2	ND	10671	2138	1.429	1.018	50mM KCl 1mM EGTA	15%PS 1% PIP2 79%PC 5%RhoPE	RhoPE
REKERQRQ	6C, 6S2	ND	11963	513.7	1.434	1.031	50mM KCl 1mM EGTA	15%PS 1% PIP2 79%PC 5%RhoPE	RhoPE
RQRQ	6C, 6S2	ND	1191	77.26	0.996	0.9802	50mM KCl 1mM EGTA	15%PS 1% PIP2 79%PC 5%RhoPE	RhoPE
WT	5G, 6D, 6S2	CisSC	43.05	2.404	1.06	0.8663	50mM KCl 1mM EGTA	15%PS 1% PIP2 79%PC 5%RhoPE	RhoPE
KEKE	6D, 6S2	CisSC	5226	593.9	1.527	0.9688	50mM KCl 1mM EGTA	15%PS 1% PIP2 79%PC 5%RhoPE	RhoPE
REKE	6D, 6S2	CisSC	5583	611.8	1.206	1.08	50mM KCl 1mM EGTA	15%PS 1% PIP2 79%PC 5%RhoPE	RhoPE
REKERQRQ	6D, 6S2	CisSC	6354	419.7	1.769	0.8337	50mM KCl 1mM EGTA	15%PS 1% PIP2 79%PC 5%RhoPE	RhoPE
RQRQ	6D, 6S2	CisSC	598.2	53.46	1.041	0.9156	50mM KCl 1mM EGTA	15%PS 1% PIP2 79%PC 5%RhoPE	RhoPE
WT	5G, 6S3, 7A	ND	4902	1232	1.027	1.137	125mM KCl 1mM EGTA	15%PS 1% PIP2 79%PC 5%RhoPE	RhoPE
KEKE	6S3	ND	8186	22.86	1.64	0.9137	125mM KCl 1mM EGTA	15%PS 1% PIP2 79%PC 5%RhoPE	RhoPE
REKE	6S3	ND	10655	399.4	1.311	1.122	125mM KCl 1mM EGTA	15%PS 1% PIP2 79%PC 5%RhoPE	RhoPE
REKERQRQ	6S3	ND	10817	1108	1.35	1.098	125mM KCl 1mM EGTA	15%PS 1% PIP2 79%PC 5%RhoPE	RhoPE
RQRQ	6S3	ND	4650	207.75	1.501	0.8954	125mM KCl 1mM EGTA	15%PS 1% PIP2 79%PC 5%RhoPE	RhoPE
WT	5G, 6S3, 7A	CisSC	365.8	41.97	0.9185	0.8763	125mM KCl 1mM EGTA	15%PS 1% PIP2 79%PC 5%RhoPE	RhoPE
KEKE	6S3	CisSC	8510	1250	1.219	1.17	125mM KCl 1mM EGTA	15%PS 1% PIP2 79%PC 5%RhoPE	RhoPE
REKE	6S3	CisSC	8539	3156	1.103	1.248	125mM KCl 1mM EGTA	15%PS 1% PIP2 79%PC 5%RhoPE	RhoPE
REKERQRQ	6S3	CisSC	9245	3234	1.293	1.14	125mM KCl 1mM EGTA	15%PS 1% PIP2 79%PC 5%RhoPE	RhoPE
RQRQ	6S3	CisSC	3582	465.7	1.163	1.059	125mM KCl 1mM EGTA	15%PS 1% PIP2 79%PC 5%RhoPE	RhoPE
WT	6E, 6S4	ND	100.4	6.494	1.107	0.9398	125mM KCl 1mM Ca	15%PS 80%PC 5%RhoPE	RhoPE
KEKE	6E, 6S4	ND	324.8	25.09	1.073	0.8823	125mM KCl 1mM Ca	15%PS 80%PC 5%RhoPE	RhoPE
REKE	6E, 6S4	ND	453.2	20.52	1.033	0.8967	125mM KCl 1mM Ca	15%PS 80%PC 5%RhoPE	RhoPE
REKERQRQ	6E, 6S4	ND	455	16.96	0.985	0.9035	125mM KCl 1mM Ca	15%PS 80%PC 5%RhoPE	RhoPE
RQRQ	6E, 6S4	ND	111.3	2.93	1.224	0.9312	125mM KCl 1mM Ca	15%PS 80%PC 5%RhoPE	RhoPE
WT	6F, 6S4	CisSC	32.33	0.978	1.332	0.8923	125mM KCl 1mM Ca	15%PS 80%PC 5%RhoPE	RhoPE
KEKE	6F, 6S4	CisSC	141.5	4.784	1.064	0.8931	125mM KCl 1mM Ca	15%PS 80%PC 5%RhoPE	RhoPE
REKE	6F, 6S4	CisSC	134.9	3.549	1.219	0.9022	125mM KCl 1mM Ca	15%PS 80%PC 5%RhoPE	RhoPE
REKERQRQ	6F, 6S4	CisSC	375.3	40.21	0.8938	0.9384	125mM KCl 1mM Ca	15%PS 80%PC 5%RhoPE	RhoPE
RQRQ	6F, 6S4	CisSC	61.53	2.228	1.11	0.9087	125mM KCl 1mM Ca	15%PS 80%PC 5%RhoPE	RhoPE
WT	5H, 6G, 6S5	ND	28.99	1.313	1.652	0.8935	125mM KCl 1mM Ca	10%PS 1% PIP2 84%PC 5%RhoPE	RhoPE
WT		ND	28.9	3.169	1.392	0.9055	125mM KCl 1mM Ca	10%PS 1% PIP2 84%PC 5%RhoPE	RhoPE
WT		ND	36.41	4.178	1.404	0.9198	125mM KCl 1mM Ca	10%PS 1% PIP2 84%PC 5%RhoPE	RhoPE
KEKE	6G, 6S5	ND	54.3	8.297	1.318	0.7977	125mM KCl 1mM Ca	10%PS 1% PIP2 84%PC 5%RhoPE	RhoPE
KEKE		ND	49.365	2.5305	1.145	0.7776	125mM KCl 1mM Ca	10%PS 1% PIP2 84%PC 5%RhoPE	RhoPE
KEKE		ND	62.35	5.045	1.374	0.7821	125mM KCl 1mM Ca	10%PS 1% PIP2 84%PC 5%RhoPE	RhoPE
REKE	6G, 6S5	ND	1688	168.5	0.9376	1.04	125mM KCl 1mM Ca	10%PS 1% PIP2 84%PC 5%RhoPE	RhoPE
REKE		ND	2896	622.5	0.7937	1.136	125mM KCl 1mM Ca	10%PS 1% PIP2 84%PC 5%RhoPE	RhoPE
REKE		ND	1500.5	161.2	1.001	0.9947	125mM KCl 1mM Ca	10%PS 1% PIP2 84%PC 5%RhoPE	RhoPE
REKERQRQ	6G, 6S5	ND	1947	248	0.8169	1.106	125mM KCl 1mM Ca	10%PS 1% PIP2 84%PC 5%RhoPE	RhoPE
REKERQRQ		ND	1740.5	71.1	1.038	1	125mM KCl 1mM Ca	10%PS 1% PIP2 84%PC 5%RhoPE	RhoPE
REKERQRQ		ND	2285.5	284.55	0.945	1.061	125mM KCl 1mM Ca	10%PS 1% PIP2 84%PC 5%RhoPE	RhoPE
RQRQ	6G, 6S5	ND	33.7	1.619	1.69	0.9043	125mM KCl 1mM Ca	10%PS 1% PIP2 84%PC 5%RhoPE	RhoPE
RQRQ		ND	26.86	1.4355	1.902	0.9004	125mM KCl 1mM Ca	10%PS 1% PIP2 84%PC 5%RhoPE	RhoPE
RQRQ		ND	36.355	5.335	1.243	0.9594	125mM KCl 1mM Ca	10%PS 1% PIP2 84%PC 5%RhoPE	RhoPE
WT	5H, 6H, 6S5	CisSC	19.69	0.5325	1.558	0.9146	125mM KCl 1mM Ca	10%PS 1% PIP2 84%PC 5%RhoPE	RhoPE
WT		CisSC	18.255	1.164	1.402	0.9165	125mM KCl 1mM Ca	10%PS 1% PIP2 84%PC 5%RhoPE	RhoPE
WT		CisSC	20.97	1.3825	1.34	0.9332	125mM KCl 1mM Ca	10%PS 1% PIP2 84%PC 5%RhoPE	RhoPE
KEKE	6H, 6S5	CisSC	51.35	4.085	1.247	0.8455	125mM KCl 1mM Ca	10%PS 1% PIP2 84%PC 5%RhoPE	RhoPE
KEKE		CisSC	45.965	3.019	1.091	0.8555	125mM KCl 1mM Ca	10%PS 1% PIP2 84%PC 5%RhoPE	RhoPE
KEKE		CisSC	53	3.369	1.235	0.872	125mM KCl 1mM Ca	10%PS 1% PIP2 84%PC 5%RhoPE	RhoPE
REKE	6H, 6S5	CisSC	271.8	10.83	1.051	0.9058	125mM KCl 1mM Ca	10%PS 1% PIP2 84%PC 5%RhoPE	RhoPE
REKE		CisSC	328.15	10.345	0.8802	0.9502	125mM KCl 1mM Ca	10%PS 1% PIP2 84%PC 5%RhoPE	RhoPE
REKE		CisSC	268.4	20.585	1.055	0.9131	125mM KCl 1mM Ca	10%PS 1% PIP2 84%PC 5%RhoPE	RhoPE
REKERQRQ	6H, 6S5	CisSC	1546	169.6	0.9138	1.041	125mM KCl 1mM Ca	10%PS 1% PIP2 84%PC 5%RhoPE	RhoPE
REKERQRQ		CisSC	1511	41.735	1.066	1.035	125mM KCl 1mM Ca	10%PS 1% PIP2 84%PC 5%RhoPE	RhoPE
REKERQRQ		CisSC	1730.5	102.35	0.8129	1.081	125mM KCl 1mM Ca	10%PS 1% PIP2 84%PC 5%RhoPE	RhoPE
RQRQ	6H, 6S5	CisSC	31.85	1.293	1.475	0.9054	125mM KCl 1mM Ca	10%PS 1% PIP2 84%PC 5%RhoPE	RhoPE
RQRQ		CisSC	27.215	1.667	1.671	0.9031	125mM KCl 1mM Ca	10%PS 1% PIP2 84%PC 5%RhoPE	RhoPE
RQRQ		CisSC	35.86	5.01	1.329	0.9619	125mM KCl 1mM Ca	10%PS 1% PIP2 84%PC 5%RhoPE	RhoPE
WT	6S6	ND	25.06	1.457	2.453	0.8938	125mM KCl 1mM Ca	15%PS 1% PIP2 79%PC 5%RhoPE	RhoPE
KEKE	6S6	ND	29.25	1.106	1.352	0.825	125mM KCl 1mM Ca	15%PS 1% PIP2 79%PC 5%RhoPE	RhoPE
REKE	6S6	ND	157	9.053	1.092	0.898	125mM KCl 1mM Ca	15%PS 1% PIP2 79%PC 5%RhoPE	RhoPE
REKERQRQ	6S6	ND	156.6	8.621	1.076	0.9087	125mM KCl 1mM Ca	15%PS 1% PIP2 79%PC 5%RhoPE	RhoPE
RQRQ	6S6	ND	19.95	1.44	1.571	0.9377	125mM KCl 1mM Ca	15%PS 1% PIP2 79%PC 5%RhoPE	RhoPE
WT	6S6	CisSC	18	1.431	1.588	0.9317	125mM KCl 1mM Ca	15%PS 1% PIP2 79%PC 5%RhoPE	RhoPE
KEKE	6S6	CisSC	29.31	0.8	1.427	0.8789	125mM KCl 1mM Ca	15%PS 1% PIP2 79%PC 5%RhoPE	RhoPE
REKE	6S6	CisSC	56.47	1.903	1.223	0.904	125mM KCl 1mM Ca	15%PS 1% PIP2 79%PC 5%RhoPE	RhoPE
REKERQRQ	6S6	CisSC	201.9	13.77	1.019	0.926	125mM KCl 1mM Ca	15%PS 1% PIP2 79%PC 5%RhoPE	RhoPE
RQRQ	6S6	CisSC	17.19	1.607	1.275	0.9677	125mM KCl 1mM Ca	15%PS 1% PIP2 79%PC 5%RhoPE	RhoPE
WT	5G, 6S3, 7A	ND	4902	1232	1.027	1.137	125mM KCl 1mM EGTA	15%PS 1% PIP2 79%PC 5%RhoPE	RhoPE
EAYW	7A	ND	4942	815	0.9751	1.213	125mM KCl 1mM EGTA	15%PS 1% PIP2 79%PC 5%RhoPE	RhoPE
WT	5G, 6S3, 7A	CisSC	365.85	32.22	0.9185	0.8763	125mM KCl 1mM EGTA	15%PS 1% PIP2 79%PC 5%RhoPE	RhoPE
EAYW	7A	CisSC	79.58	3.872	0.9128	0.8528	125mM KCl 1mM EGTA	15%PS 1% PIP2 79%PC 5%RhoPE	RhoPE
WT	7B	ND	128.8	7.2	1.085	0.9604	125mM KCl 1mM Ca	15%PS 80%PC 5%RhoPE	RhoPE
EAYW	7B	ND	124.2	6.767	1.09	0.9123	125mM KCl 1mM Ca	15%PS 80%PC 5%RhoPE	RhoPE
WT	7B	CisSC	25.02	1.153	1.301	0.8541	125mM KCl 1mM Ca	15%PS 80%PC 5%RhoPE	RhoPE
EAYW	7B	CisSC	20.91	0.7922	1.467	0.8352	125mM KCl 1mM Ca	15%PS 80%PC 5%RhoPE	RhoPE
WT	7C	ND	20.24	1.298	1.597	0.8945	125mM KCl 1mM Ca	15%PS 1% PIP2 79%PC 5%RhoPE	RhoPE
EAYW	7C	ND	21.37	0.9927	1.422	0.8839	125mM KCl 1mM Ca	15%PS 1% PIP2 79%PC 5%RhoPE	RhoPE
WT	7C	CisSC	8.69	0.5941	1.49	0.928	125mM KCl 1mM Ca	15%PS 1% PIP2 79%PC 5%RhoPE	RhoPE
EAYW	7C	CisSC	7.598	0.6338	1.411	0.9333	125mM KCl 1mM Ca	15%PS 1% PIP2 79%PC 5%RhoPE	RhoPE
WT	7D	ND	42.32	4.477	1.774	0.9066	125mM KCl 1mM Ca	10%PS 1% PIP2 84%PC 5%RhoPE	RhoPE
EAYW	7D	ND	44.25	5.101	1.602	0.9132	125mM KCl 1mM Ca	10%PS 1% PIP2 84%PC 5%RhoPE	RhoPE
WT	7D	CisSC	26.02	2.112	1.64	0.9109	125mM KCl 1mM Ca	10%PS 1% PIP2 84%PC 5%RhoPE	RhoPE
EAYW	7D	CisSC	22.65	1.875	1.552	0.9145	125mM KCl 1mM Ca	10%PS 1% PIP2 84%PC 5%RhoPE	RhoPE
WT	8A	CisSC	495	14.48	1.36	0.836	125mM KCl 1mM EGTA	15%PS 1% PIP2 84%PC	SNN 76C
WT	8A	CisSC	929	57.31	1.356	0.8752	125mM KCl 1mM EGTA	100% PC	SNN 76C
WT	8A	solubleSC	5491	1044	0.855	0.8744	125mM KCl 1mM EGTA		SNN 76C
WT	8B	CisSC	16.52	0.941	3.133	0.395	125mM KCl 1mM Ca	15%PS 1% PIP2 84%PC	SNN 76C
WT	8B	CisSC	104.4	3.739	1.662	0.9113	125mM KCl 1mM Ca	100% PC	SNN 76C
WT	8B	solubleSC	459.9	30.32	1.014	0.8049	125mM KCl 1mM Ca		SNN 76C
WT	8G	CisSC	495	14.48	1.36	0.836	125mM KCl 1mM EGTA	15%PS 1% PIP2 84%PC	SNN 76C
EAYW	8G	CisSC	150.2	2.497	1.111	0.8852	125mM KCl 1mM EGTA	15%PS 1% PIP2 84%PC	SNN 76C
REKE	8G	CisSC	12187	292.4	2.334	0.6036	125mM KCl 1mM EGTA	15%PS 1% PIP2 84%PC	SNN 76C
RQRQ	8G	CisSC	9348	Perfect fit	1.428	0.837	125mM KCl 1mM EGTA	15%PS 1% PIP2 84%PC	SNN 76C
WT	8H	CisSC	16.52	0.941	3.133	0.395	125mM KCl 1mM Ca	15%PS 1% PIP2 84%PC	SNN 76C
EAYW	8H	CisSC	12.4	0.6553	1.941	0.5606	125mM KCl 1mM Ca	15%PS 1% PIP2 84%PC	SNN 76C
REKE	8H	CisSC	204.3	15.81	1.131	0.6725	125mM KCl 1mM Ca	15%PS 1% PIP2 84%PC	SNN 76C
RQRQ	8H	CisSC	n.d.	n.d.	n.d.	n.d.	125mM KCl 1mM Ca	15%PS 1% PIP2 84%PC	SNN 76C
WT	8E	CisSC	929	57.31	1.356	0.8752	125mM KCl 1mM EGTA	100%PC	SNN 76C
EAYW	8E	CisSC	296.2	15.74	1.243	0.9019	125mM KCl 1mM EGTA	100%PC	SNN 76C
REKE	8E	CisSC	21789	Perfect fit	1.469	0.887	125mM KCl 1mM EGTA	100%PC	SNN 76C
RQRQ	8E	CisSC	12873	545.8	1.576	0.8384	125mM KCl 1mM EGTA	100%PC	SNN 76C
WT	8F	CisSC	104.4	3.739	1.662	0.9113	125mM KCl 1mM Ca	100%PC	SNN 76C
EAYW	8F	CisSC	57.86	1.464	1.452	0.904	125mM KCl 1mM Ca	100%PC	SNN 76C
REKE	8F	CisSC	1067	71.14	1.205	0.8847	125mM KCl 1mM Ca	100%PC	SNN 76C
RQRQ	8F	CisSC	449.4	23.27	1.297	0.8476	125mM KCl 1mM Ca	100%PC	SNN 76C
WT	8C	solubleSC	5491	1044	0.855	0.8744	125mM KCl 1mM EGTA		SNN 76C
EAYW	8C	solubleSC	2039	199.4	0.7613	0.8762	125mM KCl 1mM EGTA		SNN 76C
REKE	8C	solubleSC	31971	Perfect fit	1.255	0.8851	125mM KCl 1mM EGTA		SNN 76C
RQRQ	8C	solubleSC	27555	7667	0.9565	1.07	125mM KCl 1mM EGTA		SNN 76C
WT	8D	solubleSC	459.9	30.32	1.014	0.8049	125mM KCl 1mM Ca		SNN 76C
EAYW	8D	solubleSC	207.5	7.04	1.019	0.8063	125mM KCl 1mM Ca		SNN 76C
REKE	8D	solubleSC	3021	212.4	1.13	0.6426	125mM KCl 1mM Ca		SNN 76C
RQRQ	8D	solubleSC	1098	41.4	1.313	0.6693	125mM KCl 1mM Ca		SNN 76C
WT	8S1 A	mcc	13116	1268	1.005	0.9087	125mM KCl 1mM EGTA		SNN 76C
WT	8S1 A	solubleSC	5491	1044	0.855	0.8744	125mM KCl 1mM EGTA		SNN 76C
WT	8S1 B	mcc	1653	69.98	1.066	0.8826	125mM KCl 1mM Ca		SNN 76C
WT	8S1 B	solubleSC	459.9	30.32	1.014	0.8049	125mM KCl 1mM Ca		SNN 76C
WT	8S1 C	mcc	13116	1268	1.005	0.9087	125mM KCl 1mM EGTA		SNN 76C
EAYW	8S1 C	mcc	9635	1319	0.8641	0.9827	125mM KCl 1mM EGTA		SNN 76C
REKE	8S1 C	mcc	123533	Perfect fit	1.01	1.355	125mM KCl 1mM EGTA		SNN 76C
RQRQ	8S1 C	mcc	112331	Perfect fit	0.6139	1.509	125mM KCl 1mM EGTA		SNN 76C
WT	8S1 D	mcc	1653	69.98	1.066	0.8826	125mM KCl 1mM Ca		SNN 76C
EAYW	8S1 D	mcc	876.6	11.34	1.093	0.9015	125mM KCl 1mM Ca		SNN 76C
REKE	8S1 D	mcc	33878	24553	0.8712	1.088	125mM KCl 1mM Ca		SNN 76C
RQRQ	8S1 D	mcc	1987	97.84	1.075	0.8077	125mM KCl 1mM Ca		SNN 76C
WT	9A, 9C	ND	7247	381.4	1.47	1.086	125mM KCl 1mM EGTA 2.5mM MgCl2 2mM ATP	15%PS 1% PIP2 79%PC 5%RhoPE	RhoPE
WT	9A, 9D	CisSC	3319	275.8	1.149	1.03	125mM KCl 1mM EGTA 2.5mM MgCl2 2mM ATP	15%PS 1% PIP2 79%PC 5%RhoPE	RhoPE
WT	9B, 9F	ND	35.95	1.909	1.624	0.9179	125mM KCl 1mM Ca 2.5mM MgCl2 2mM ATP	15%PS 1% PIP2 79%PC 5%RhoPE	RhoPE
WT	9B	CisSC	29.57	1.338	1.472	0.9147	125mM KCl 1mM Ca 2.5mM MgCl2 2mM ATP	15%PS 1% PIP2 79%PC 5%RhoPE	RhoPE
WT	9A, 9C	ND	7247	381.4	1.47	1.086	125mM KCl 1mM EGTA 2.5mM MgCl2 2mM ATP	15%PS 1% PIP2 79%PC 5%RhoPE	RhoPE
EAYW	9C	ND	6464	706.5	1.246	1.139	125mM KCl 1mM EGTA 2.5mM MgCl2 2mM ATP	15%PS 1% PIP2 79%PC 5%RhoPE	RhoPE
KEKE	9C	ND	10148	1038	1.277	1.115	125mM KCl 1mM EGTA 2.5mM MgCl2 2mM ATP	15%PS 1% PIP2 79%PC 5%RhoPE	RhoPE
REKE	9C	ND	10482	549.5	1.278	1.128	125mM KCl 1mM EGTA 2.5mM MgCl2 2mM ATP	15%PS 1% PIP2 79%PC 5%RhoPE	RhoPE
REKERQRQ	9C	ND	8751	612.5	1.622	0.9962	125mM KCl 1mM EGTA 2.5mM MgCl2 2mM ATP	15%PS 1% PIP2 79%PC 5%RhoPE	RhoPE
RQRQ	9C	ND	8338	607	1.377	1.106	125mM KCl 1mM EGTA 2.5mM MgCl2 2mM ATP	15%PS 1% PIP2 79%PC 5%RhoPE	RhoPE
WT	9A, 9D	CisSC	3319	462.45	1.149	1.03	125mM KCl 1mM EGTA 2.5mM MgCl2 2mM ATP	15%PS 1% PIP2 79%PC 5%RhoPE	RhoPE
EAYW	9D	CisSC	1074	95.85	0.8624	1.001	125mM KCl 1mM EGTA 2.5mM MgCl2 2mM ATP	15%PS 1% PIP2 79%PC 5%RhoPE	RhoPE
KEKE	9D	CisSC	10781	1215	1.188	1.208	125mM KCl 1mM EGTA 2.5mM MgCl2 2mM ATP	15%PS 1% PIP2 79%PC 5%RhoPE	RhoPE
REKE	9D	CisSC	9448	778.4	1.227	1.173	125mM KCl 1mM EGTA 2.5mM MgCl2 2mM ATP	15%PS 1% PIP2 79%PC 5%RhoPE	RhoPE
REKERQRQ	9D	CisSC	8943	460.5	1.49	1.021	125mM KCl 1mM EGTA 2.5mM MgCl2 2mM ATP	15%PS 1% PIP2 79%PC 5%RhoPE	RhoPE
RQRQ	9D	CisSC	8289	1049	1.153	1.17	125mM KCl 1mM EGTA 2.5mM MgCl2 2mM ATP	15%PS 1% PIP2 79%PC 5%RhoPE	RhoPE
WT	9E	CisSC	3360	51.9	1.004	1.103	125mM KCl 1mM EGTA 2.5mM MgCl2 2mM ATP	15%PS 1% PIP2 79%PC 5%RhoPE	RhoPE
WT	9E	CisSC 2X CpxFL	3530	314.2	1.09	1.068	125mM KCl 1mM EGTA 2.5mM MgCl2 2mM ATP	15%PS 1% PIP2 79%PC 5%RhoPE	RhoPE
WT	9B, 9F	ND	35.95	1.909	1.624	0.9179	125mM KCl 1mM Ca 2.5mM MgCl2 2mM ATP	15%PS 1% PIP2 79%PC 5%RhoPE	RhoPE
KEKE	9F	ND	73.16	6.158	1.352	0.7935	125mM KCl 1mM Ca 2.5mM MgCl2 2mM ATP	15%PS 1% PIP2 79%PC 5%RhoPE	RhoPE
REKE	9F	ND	1216	74.74	1.079	0.9537	125mM KCl 1mM Ca 2.5mM MgCl2 2mM ATP	15%PS 1% PIP2 79%PC 5%RhoPE	RhoPE
