# Supplementary material for: Ca2+-dependent release of synaptotagmin-1 from the SNARE complex on phosphatidylinositol 4,5-bisphosphate-containing membranes
Source: eLife. 2020 Aug 18;9:e57154. doi: 10.7554/eLife.57154 (PMC7498268; doi:10.7554/eLife.57154)
Supplement: Supplementary file 2. — The Figures showing the data used to derive the cooperativity factors are indicated. Table Supplement 1 describes the KDs used for the calculations. [file elife-57154-supp2.xlsx]

## Sheet: Sheet1
Cooperativity factors calculated as ratios of KDs measured in titrations of C2AB* with: i) NDs vs. cisSC-NDs; ii) NDs or cisSC-NDs in EGTA in the absence vs. the presence of Mg-ATP; iii) solubleSC vs. cisSC-NDs in the presence of EGTA or Ca2+; and iv) soluble SC vs. cisSC-PC-PS-PIP2-NDs in the presence of EGTA or Ca2+. The Figures showing the data used to derive the cooperativity factors are indi…
		KD ND/ KD cisSC-ND						KD ND/ KD cisSC-ND
Conditions	Figure	WT	RQRQ	REKE	KEKE	REKERQRQ	Figure	WT	EAYW
50 mM KCl 1 mM EGTA 15% PS	5C, 6A,B, 6S1	62.1	3.34	1.79	1.41	1.14
50 mM KCl 1 mM EGTA 1% PIP2 15% PS	5G, 6C,D, 6S2	6.64	1.99	1.91	2.19	1.88
125 mM KCl 1 mM EGTA 1% PIP2 15% PS	5G, 6S3	13.4	1.3	1.25	0.96	1.17	7A	13.4	62.1
125 mM KCl 1 mM EGTA 1% PIP2 15% PS 2.5mM Mg2+ 2mM ATP	9A,C,D	2.18	1.01	1.11	0.94	0.98	9A,C,D	2.18	6.02
125 mM KCl 1 mM Ca2+ 15% PS	6E,F, 6S4	3.11	1.81	3.36	2.3	1.21	7B	5.14	5.94
125 mM KCl 1 mM Ca2+ 1% PIP2 10% PS	5H, 6G, 6S5, 6H	1.47	1.06	6.21	1.06	1.26	7D	1.62	1.95
125 mM KCl 1 mM Ca2+ 1% PIP2 15% PS	6S6	1.39	1.16	2.78	1	0.78	7C	2.33	2.81
125 mM KCl 1 mM Ca2+ 1% PIP2 15% PS 2.5mM Mg2+ 2mM ATP	9B	1.21
	Figure	KD ND +(Mg-ATP)/KD ND -(Mg-ATP)				KD cisSC-ND +(Mg-ATP)/KD cisSC-ND -(Mg-ATP)
WT	9C,D	1.48				9.07
EAYW	9C,D	1.31				13.5
RQRQ	9C,D	1.79				2.31
KEKE	9C,D	1.24				1.27
REKE	9C,D	0.98				1.11
REKERQRQ	9C,D	0.81				0.97
	Figure	KD solubleSC/KD CisSC-PC-ND EGTA				KD solubleSC/KD CisSC-PC-ND Ca2+
WT	8C,D,E,F	5.91				4.4
EAYW	8C,D,E,F	6.88				3.58
REKE	8C,D,E,F	1.46				2.83
RQRQ	8C,D,E,F	2.14				2.44
	Figure	KD solubleSC/KD CisSC-PCPS-PIP2-ND EGTA				KD solubleSC/KD CisSC-PCPS-PIP2-ND Ca2+
WT	8C,D,G,H	11.09				27.83
EAYW	8C,D,G,H	13.57				16.73
REKE	8C,D,G,H	2.62				14.78
RQRQ	8C,D,G,H	2.94				n.d.
