# Supplementary figures and images for: Ca2+-dependent release of synaptotagmin-1 from the SNARE complex on phosphatidylinositol 4,5-bisphosphate-containing membranes
Source: eLife journal article supplement (doi:10.7554/elife.57154), 2020-08-18

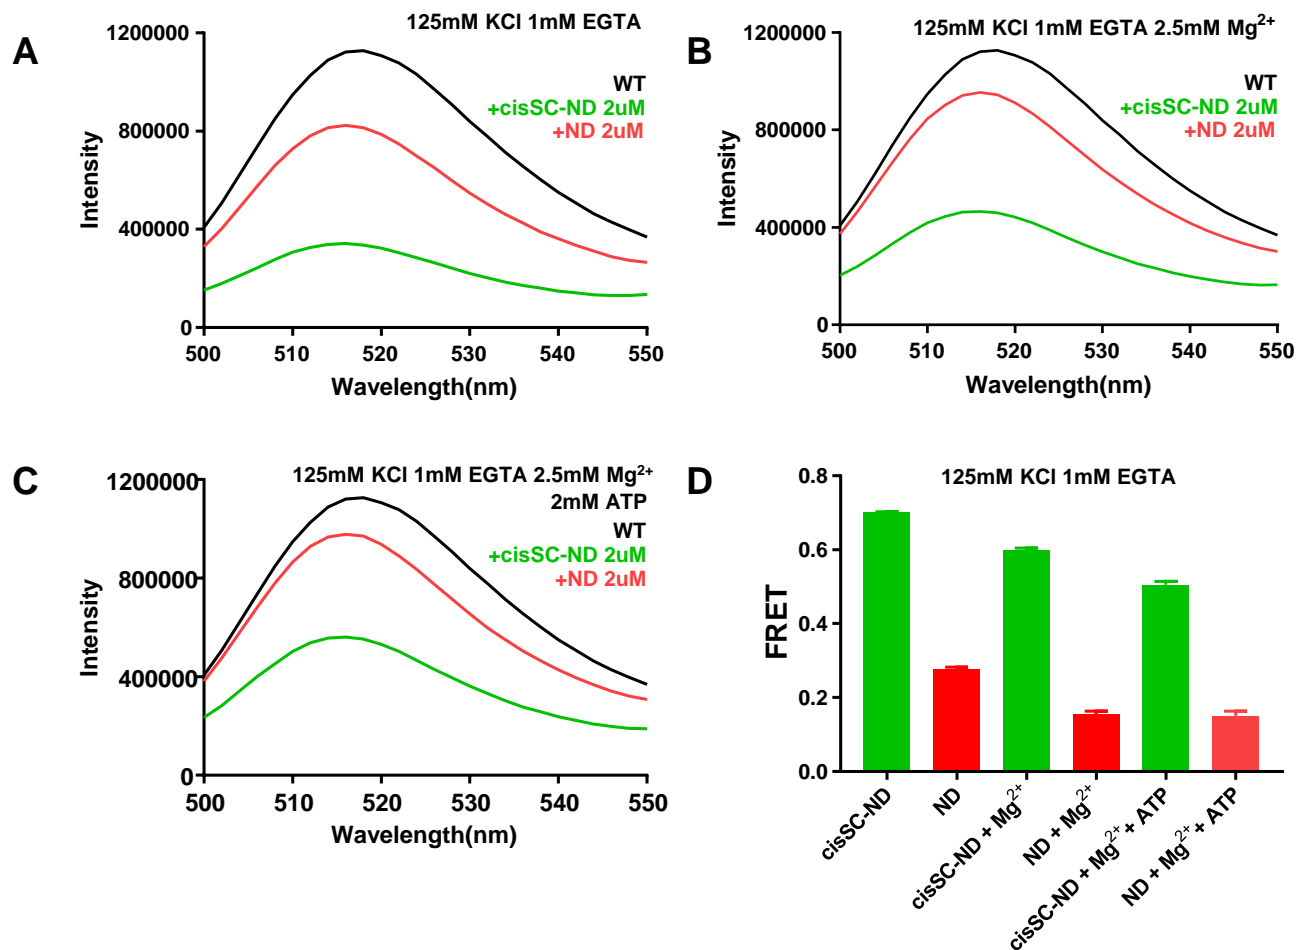

**Figure 9 – S1**  
Voleti, Jaczynska et al.

Supplement: supp [file elife-57154-supp-v1.zip]

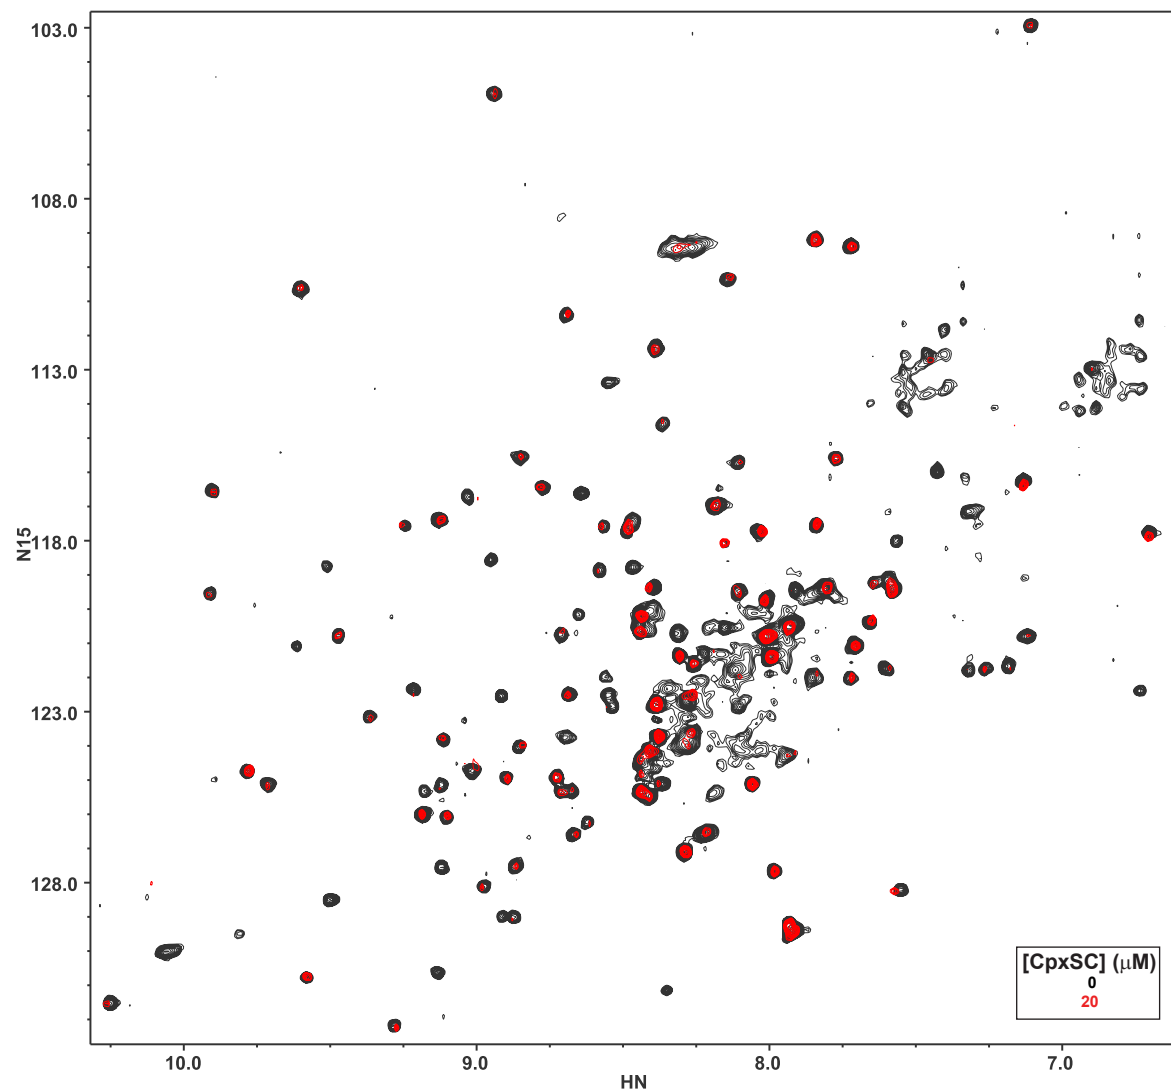

Figure 3 - S1  
Voleti, Jaczynska et al.

Supplement: supp [file elife-57154-supp-v1.zip]

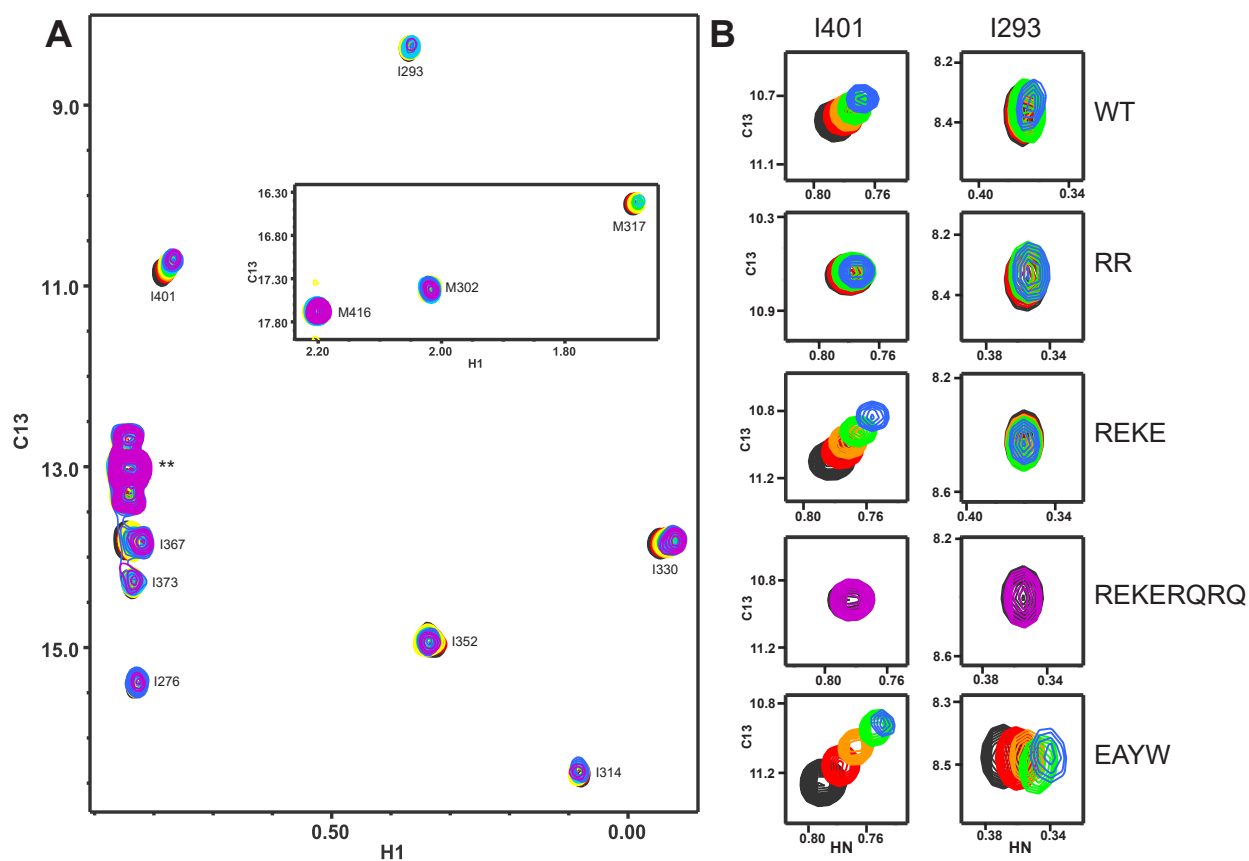

Figure 4 - S1  
Voleti, Jaczynska et al.

Supplement: supp [file elife-57154-supp-v1.zip]

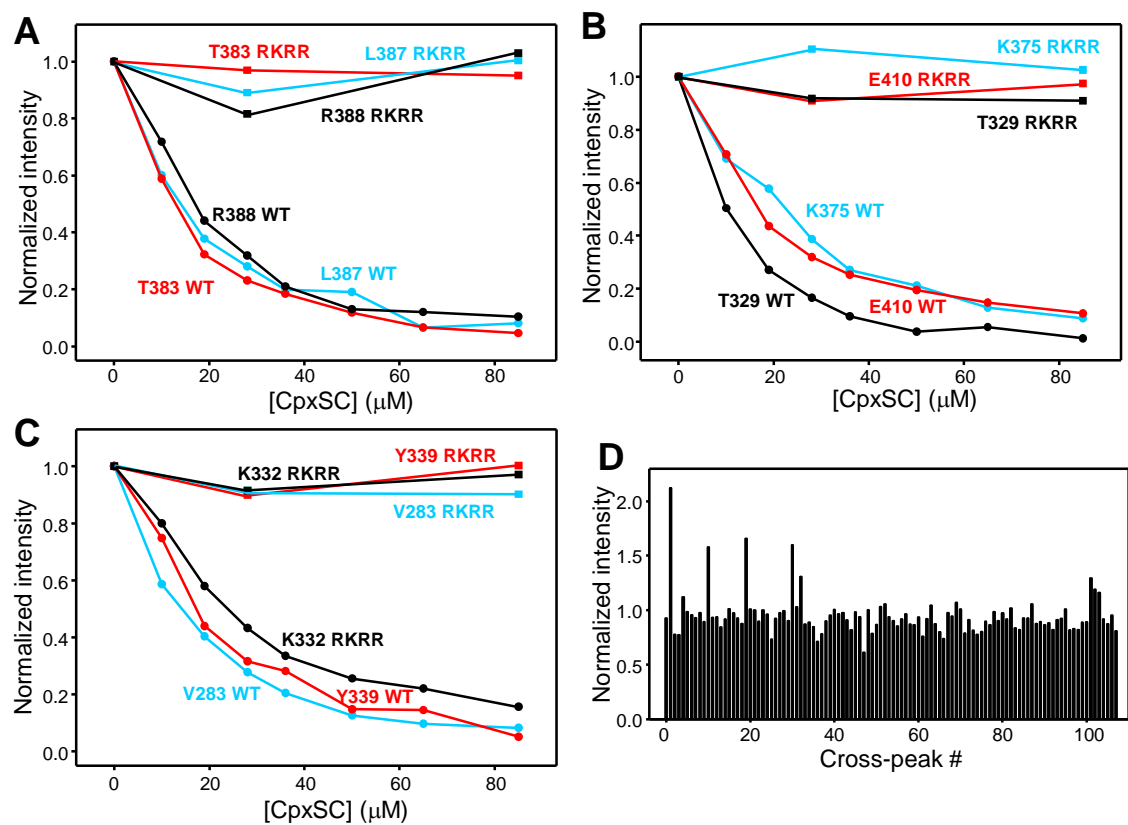

**Figure 2 – S2**  
Voleti, Jaczynska et al.

Supplement: supp [file elife-57154-supp-v1.zip]

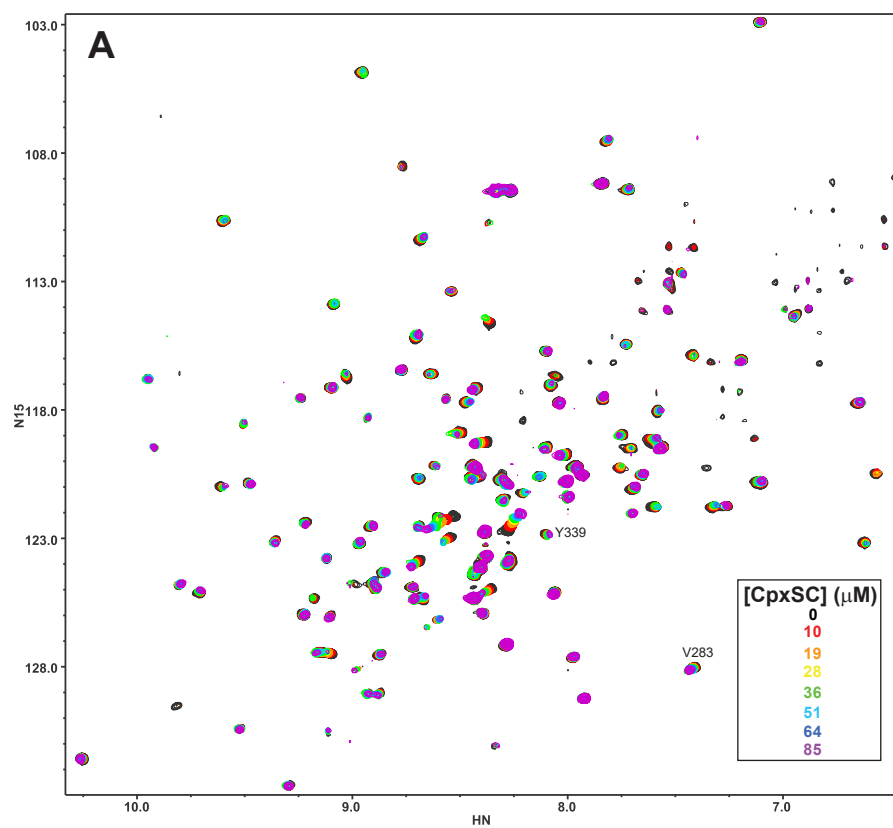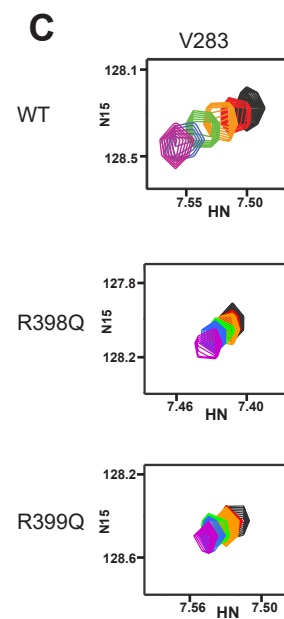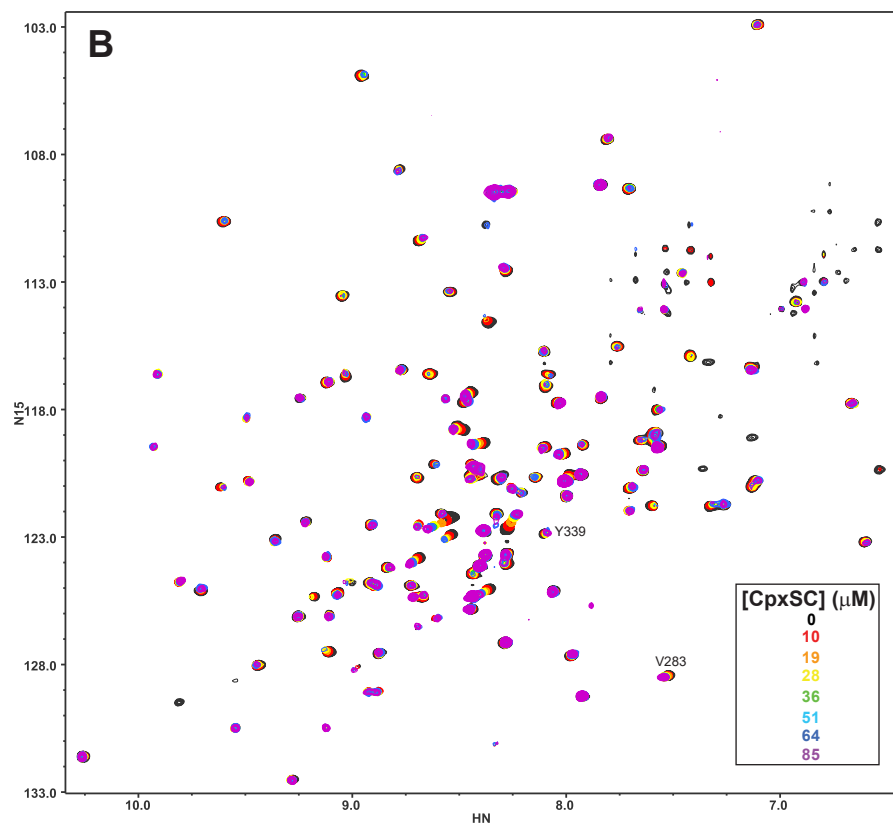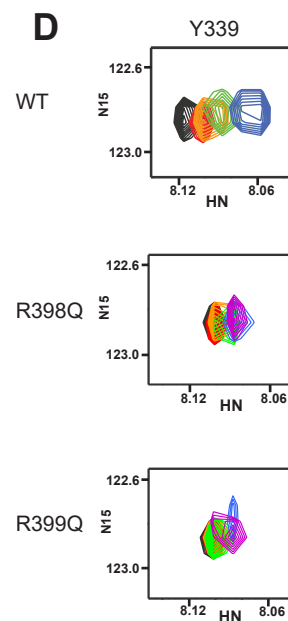

Figure 2 - S1  
Voleti, Jaczynska et al.

Supplement: supp [file elife-57154-supp-v1.zip]

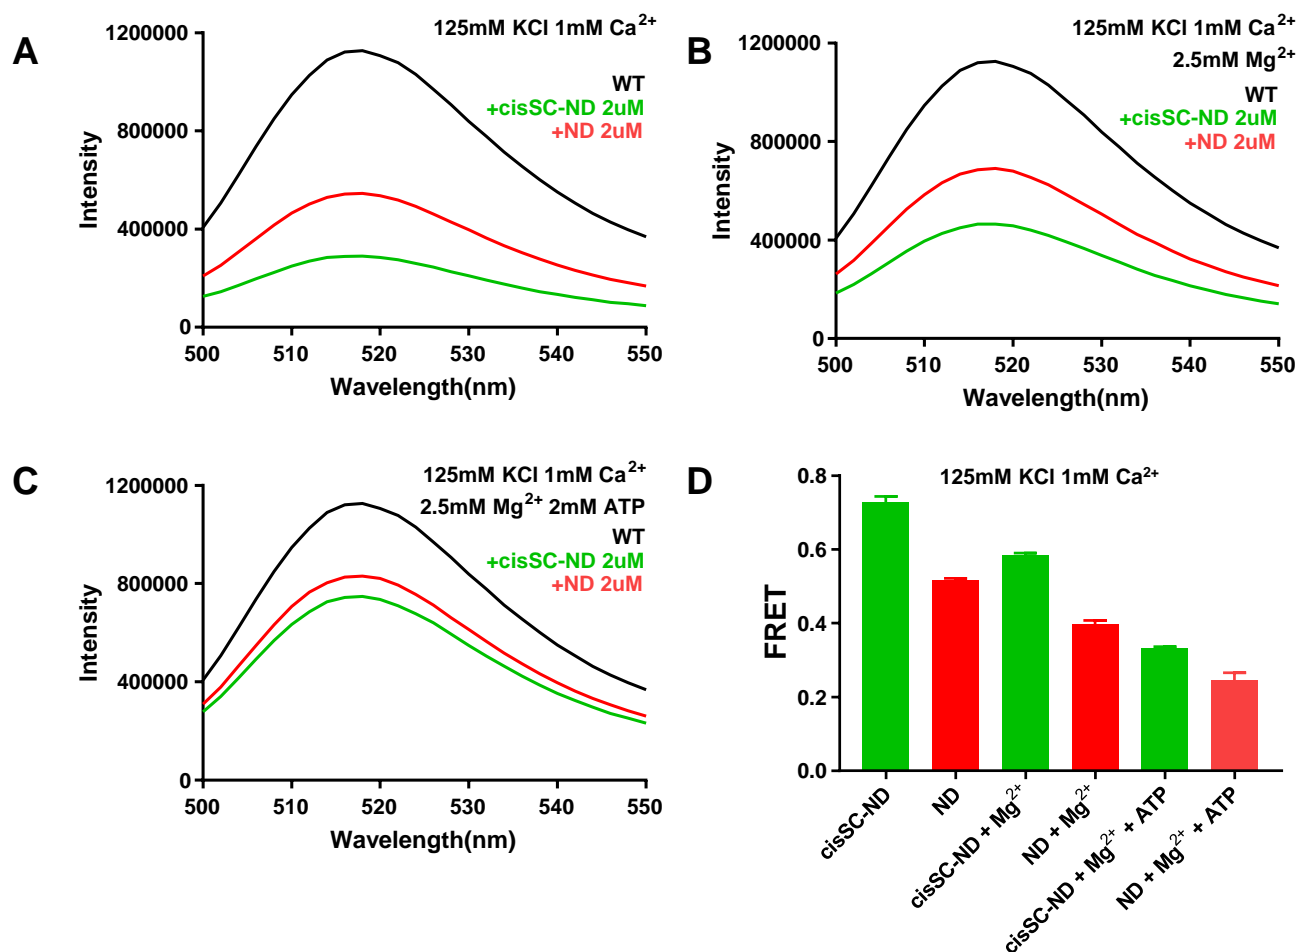

**Figure 9 – S2**  
**Voleti, Jaczynska et al.**

Supplement: supp [file elife-57154-supp-v1.zip]

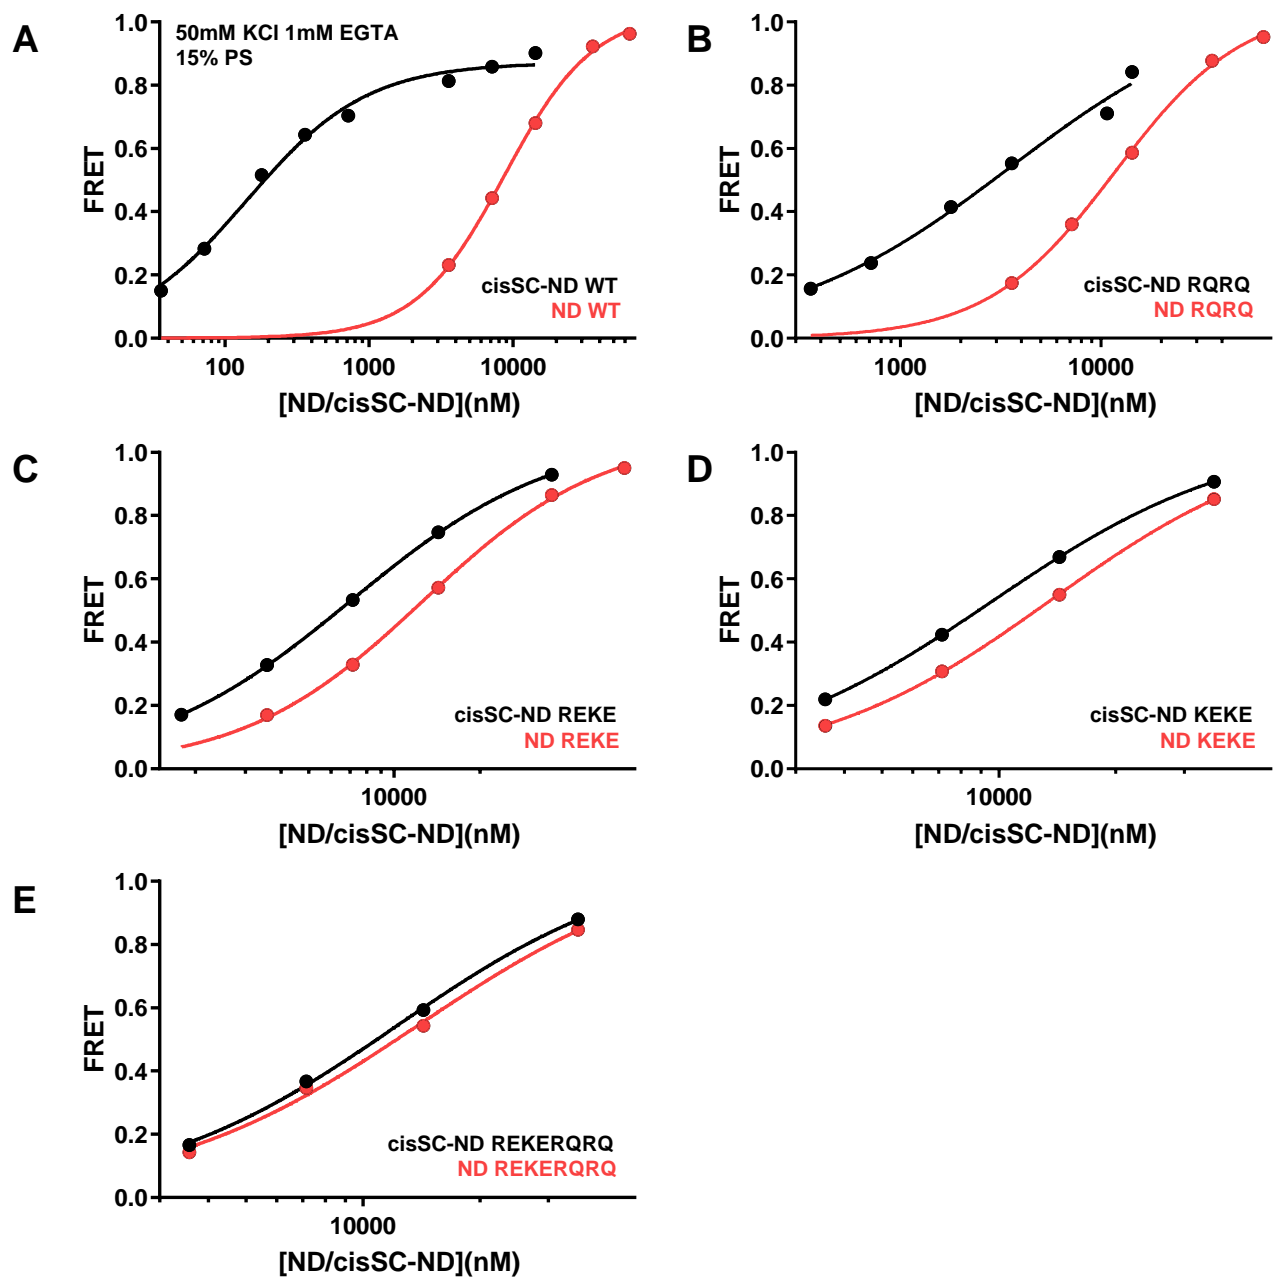

**Figure 6 – S1**  
Voleti, Jaczynska et al.

Supplement: supp [file elife-57154-supp-v1.zip]

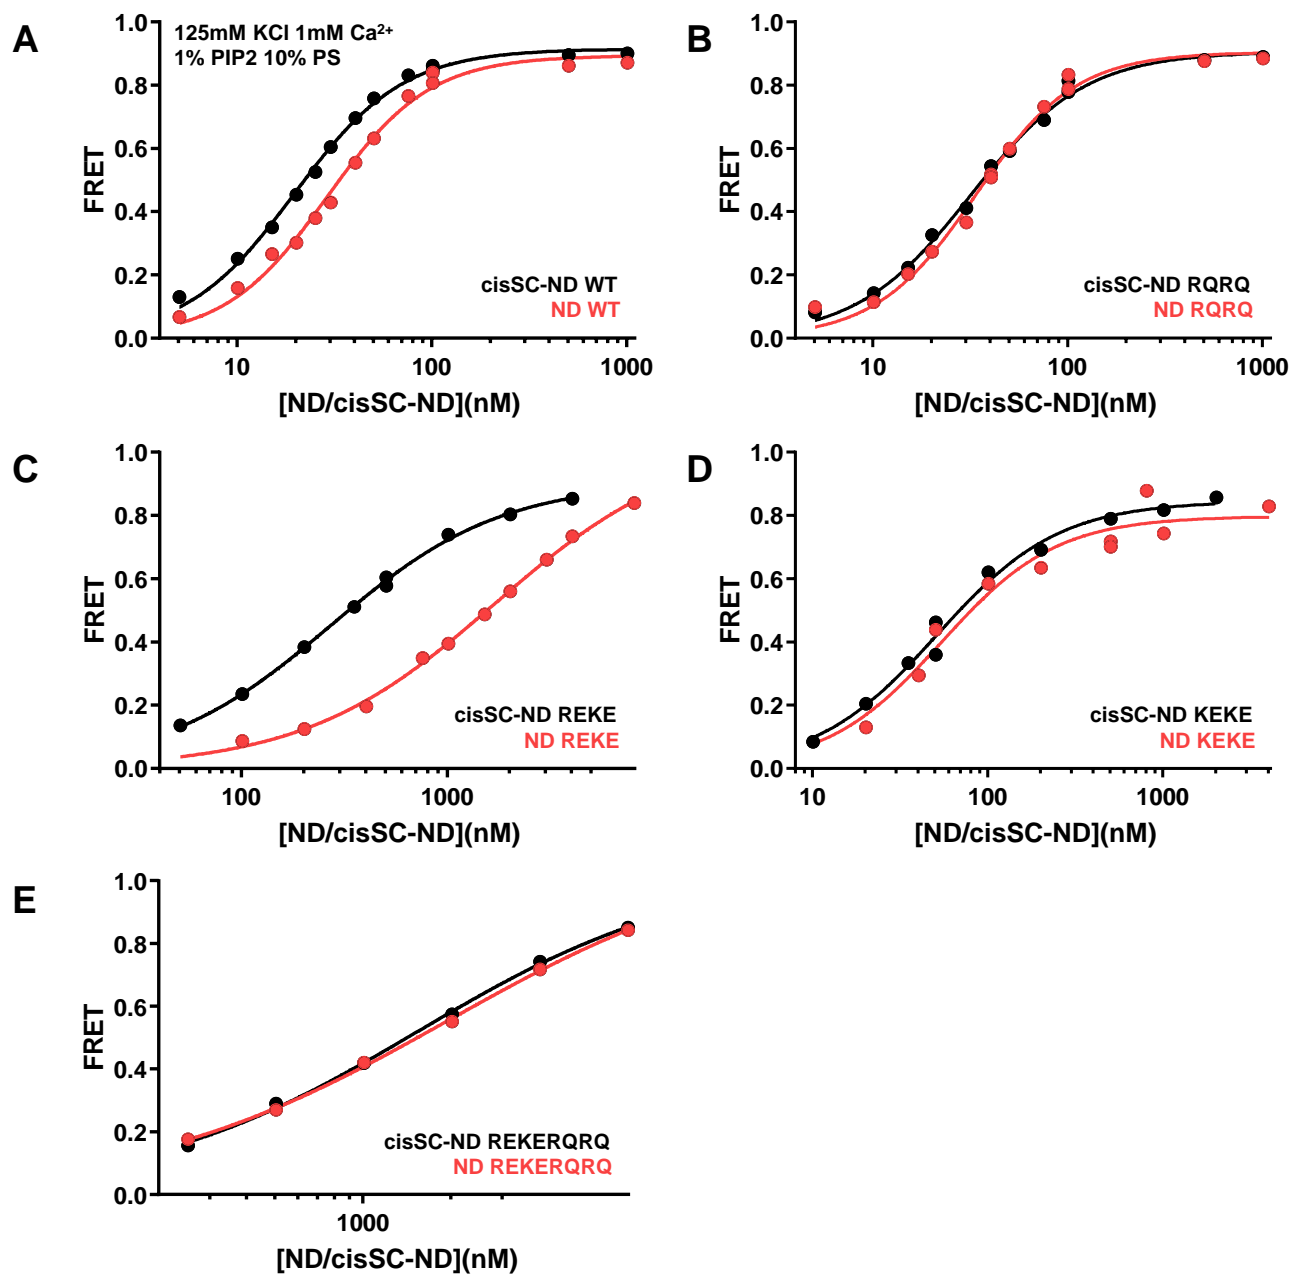

**Figure 6 – S5**  
Voleti, Jaczynska et al.

Supplement: supp [file elife-57154-supp-v1.zip]

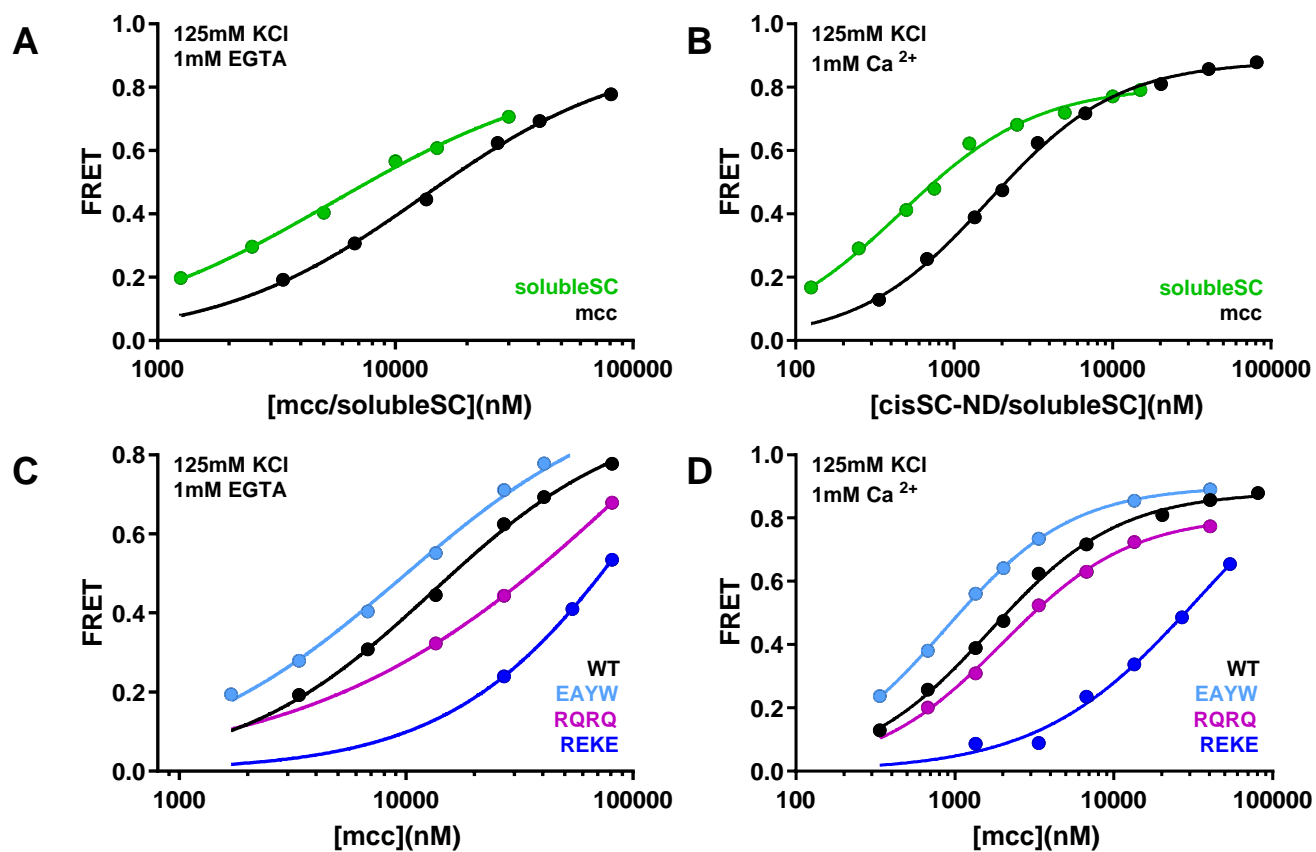

**Figure 8 – S1**  
Voleti, Jaczynska et al.

Supplement: supp [file elife-57154-supp-v1.zip]

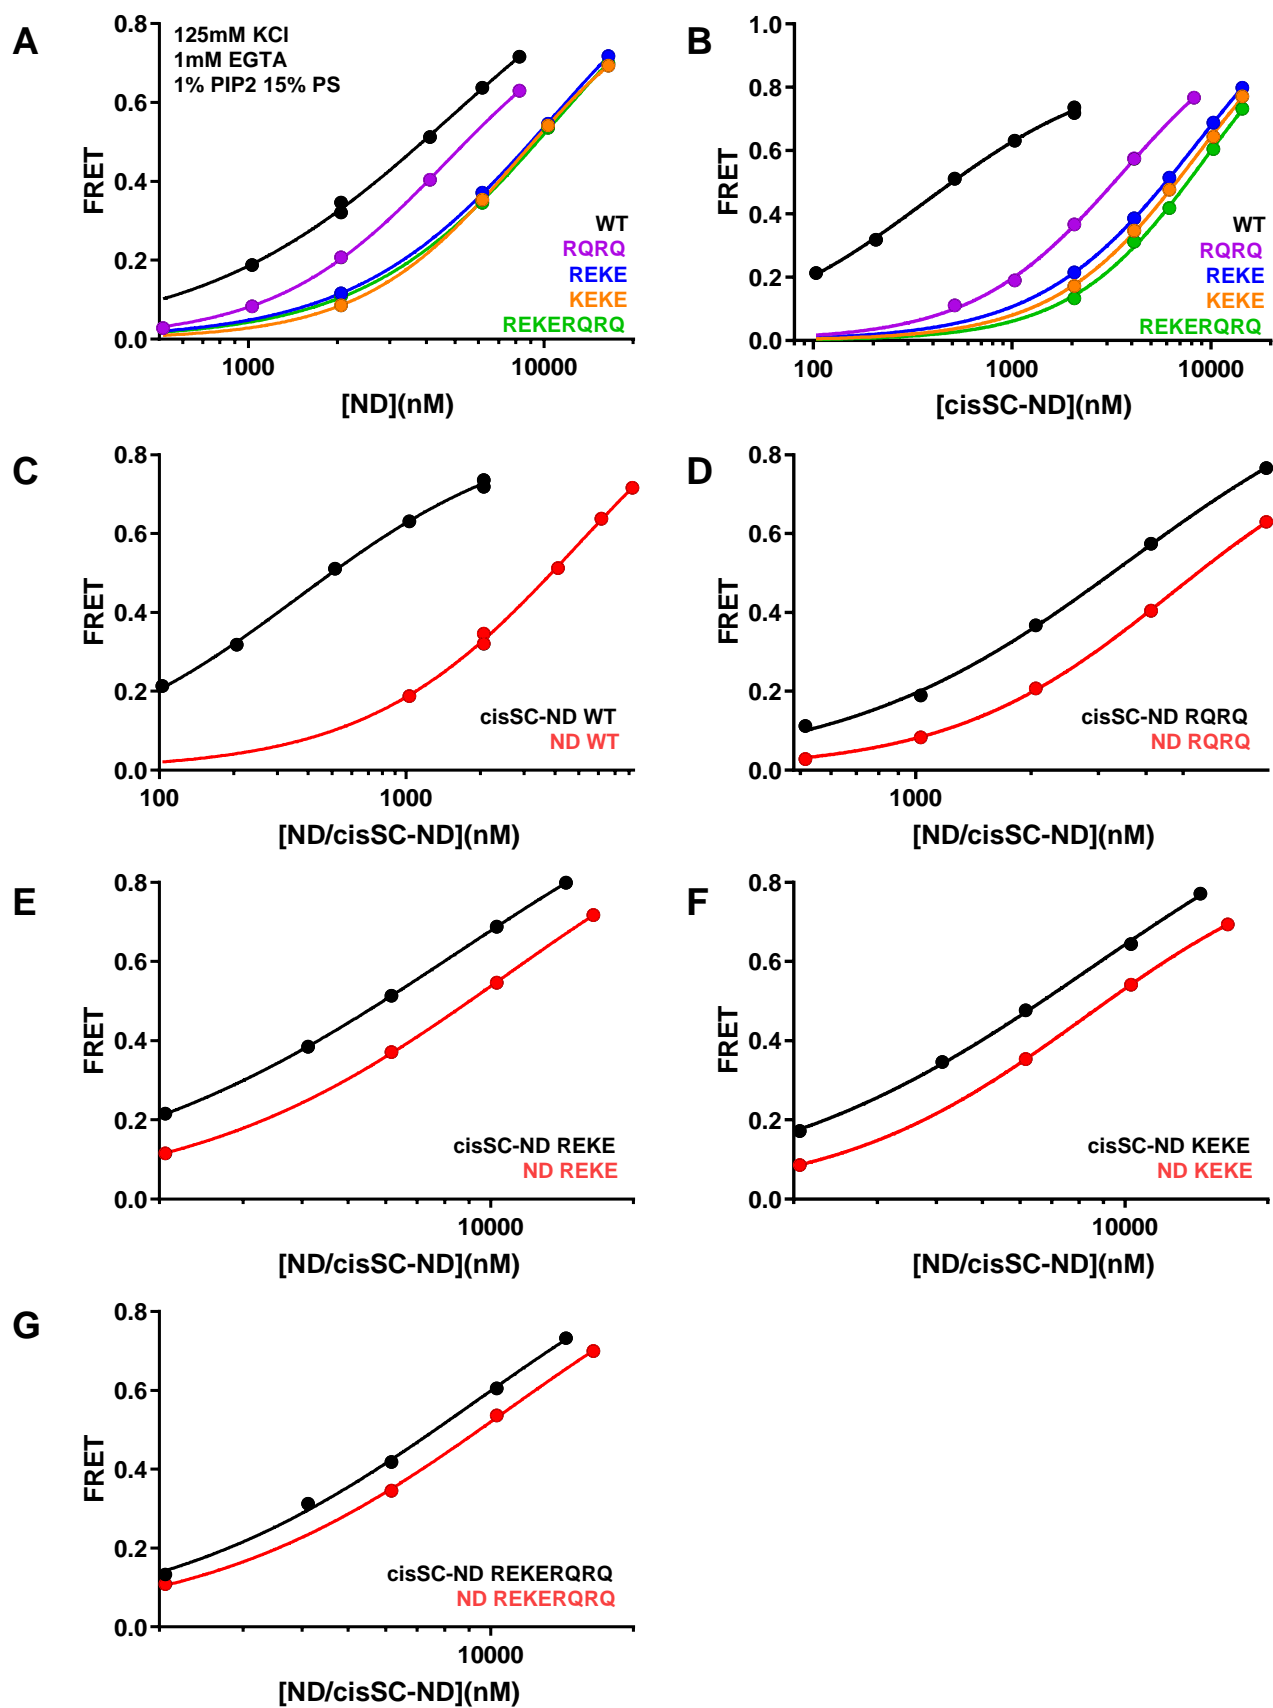

**Figure 6 – S3**  
Voleti, Jaczynska et al.

Supplement: supp [file elife-57154-supp-v1.zip]

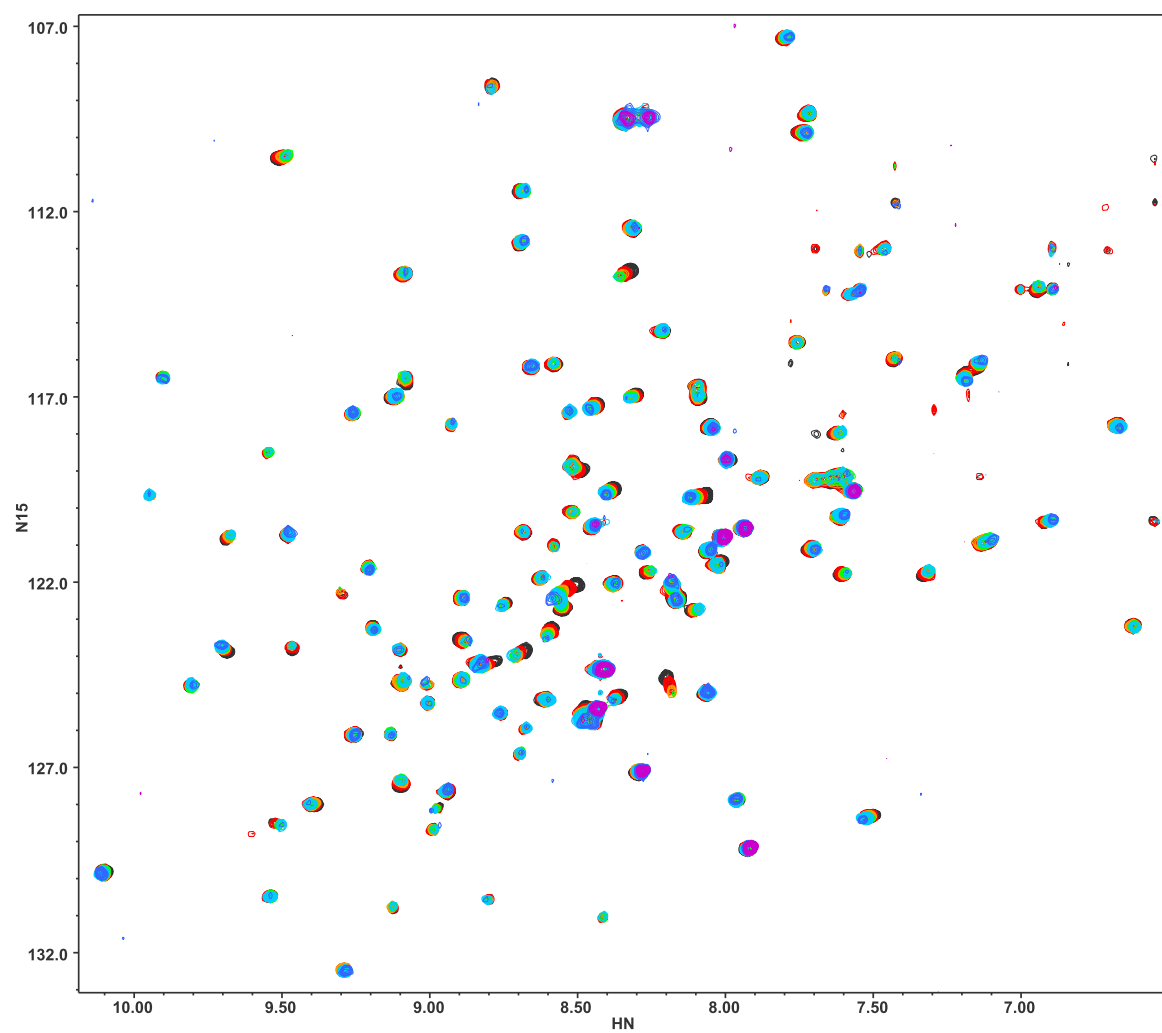

Figure 1 - S2  
Voleti, Jaczynska et al.

Supplement: supp [file elife-57154-supp-v1.zip]

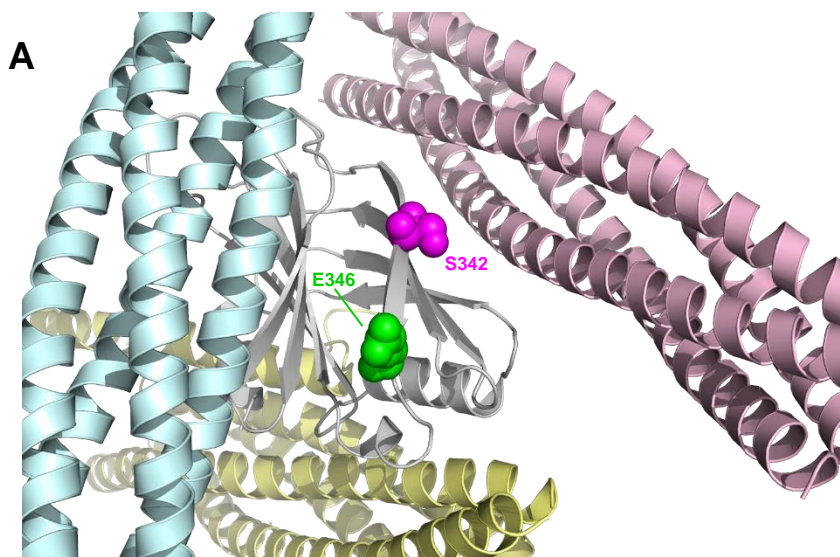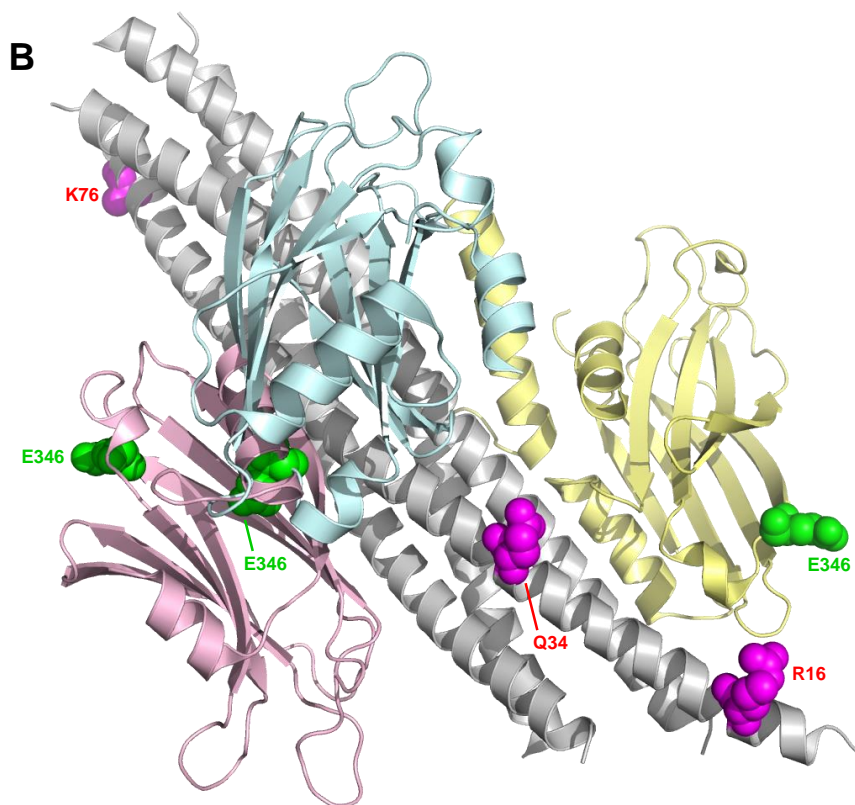

**Figure 5 – S1**  
Voleti, Jaczynska et al.

Supplement: supp [file elife-57154-supp-v1.zip]

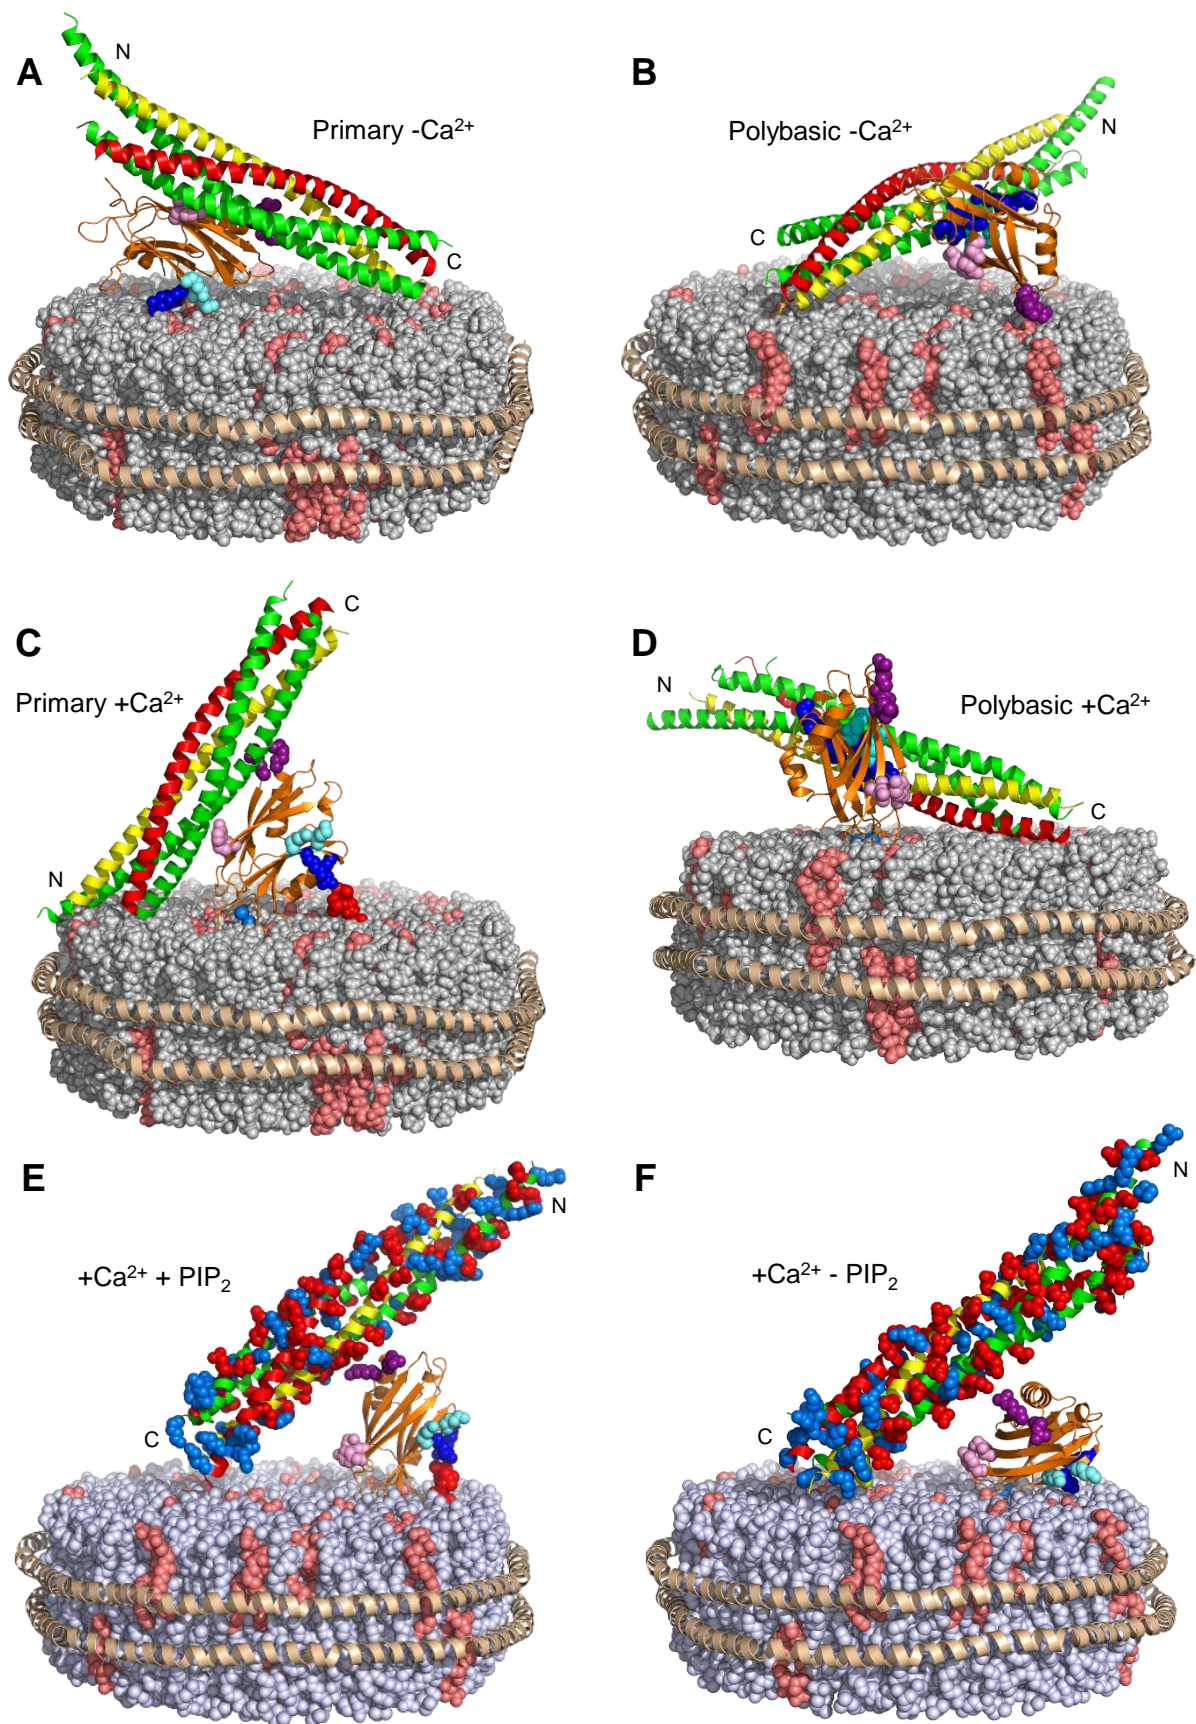

**Figure 5 – S2**  
Voleti, Jaczynska et al.

Supplement: supp [file elife-57154-supp-v1.zip]

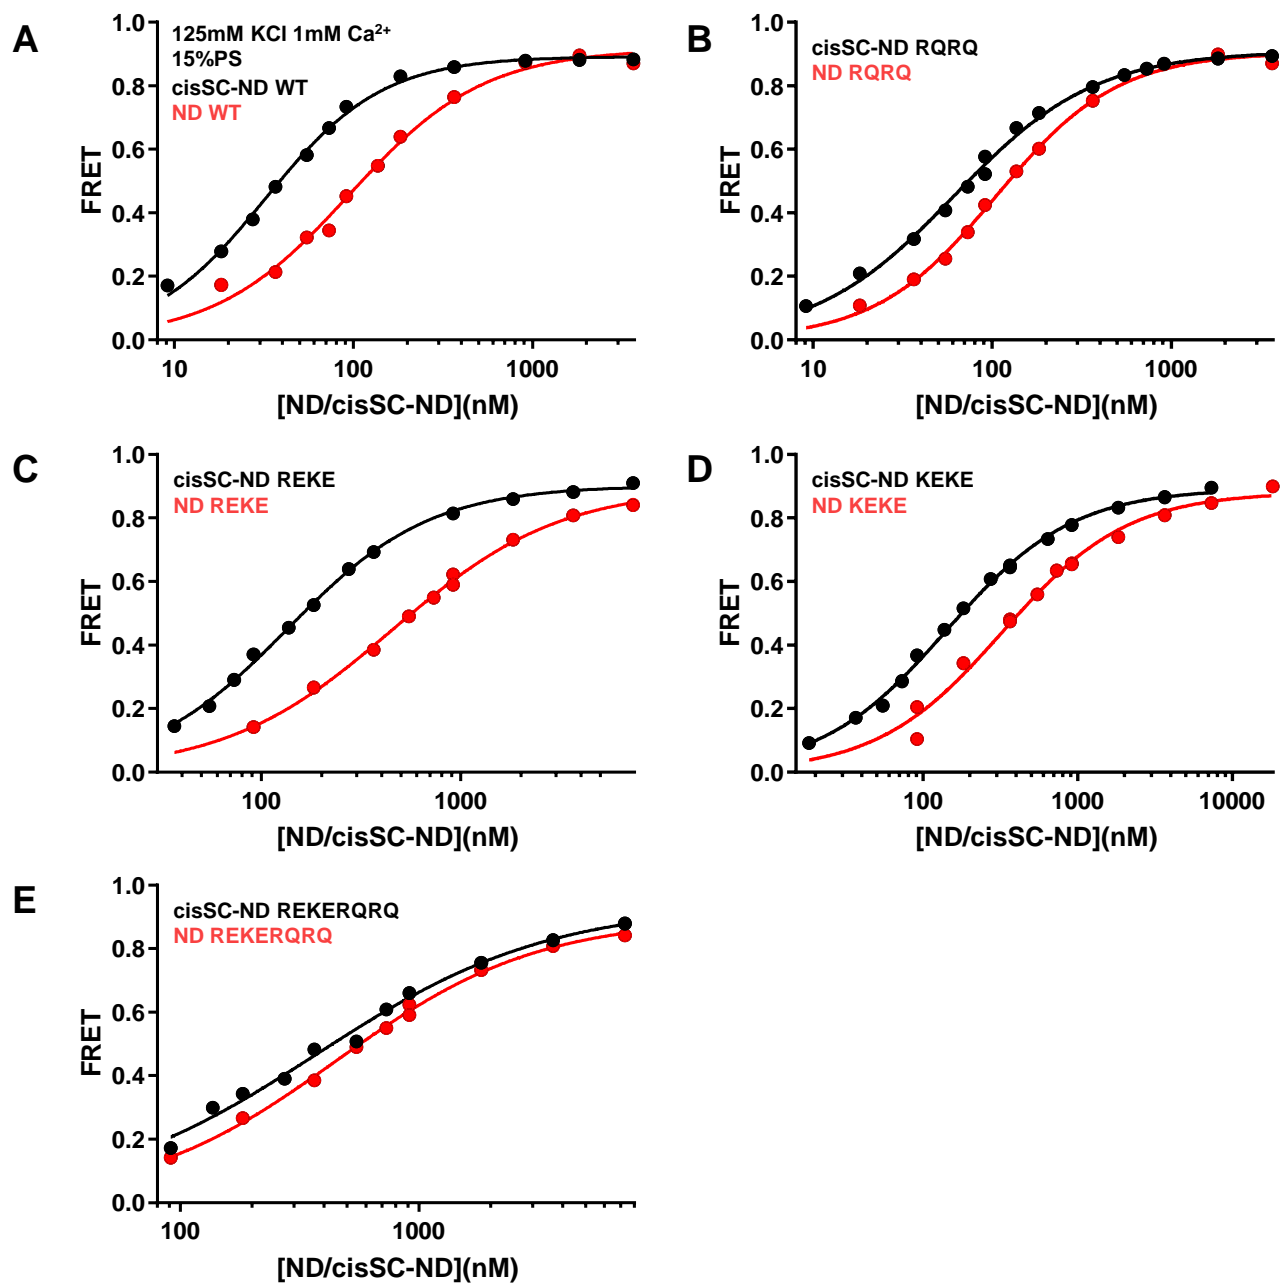

**Figure 6 – S4**  
Voleti, Jaczynska et al.

Supplement: supp [file elife-57154-supp-v1.zip]

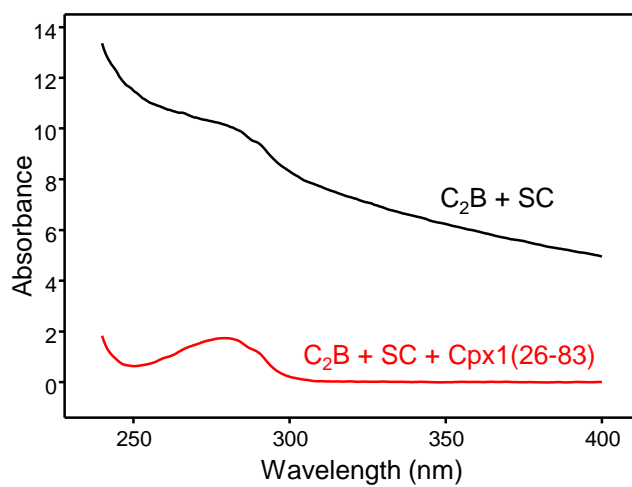

**Figure 1 – S1**  
**Voleti, Jaczynska et al.**

Supplement: supp [file elife-57154-supp-v1.zip]

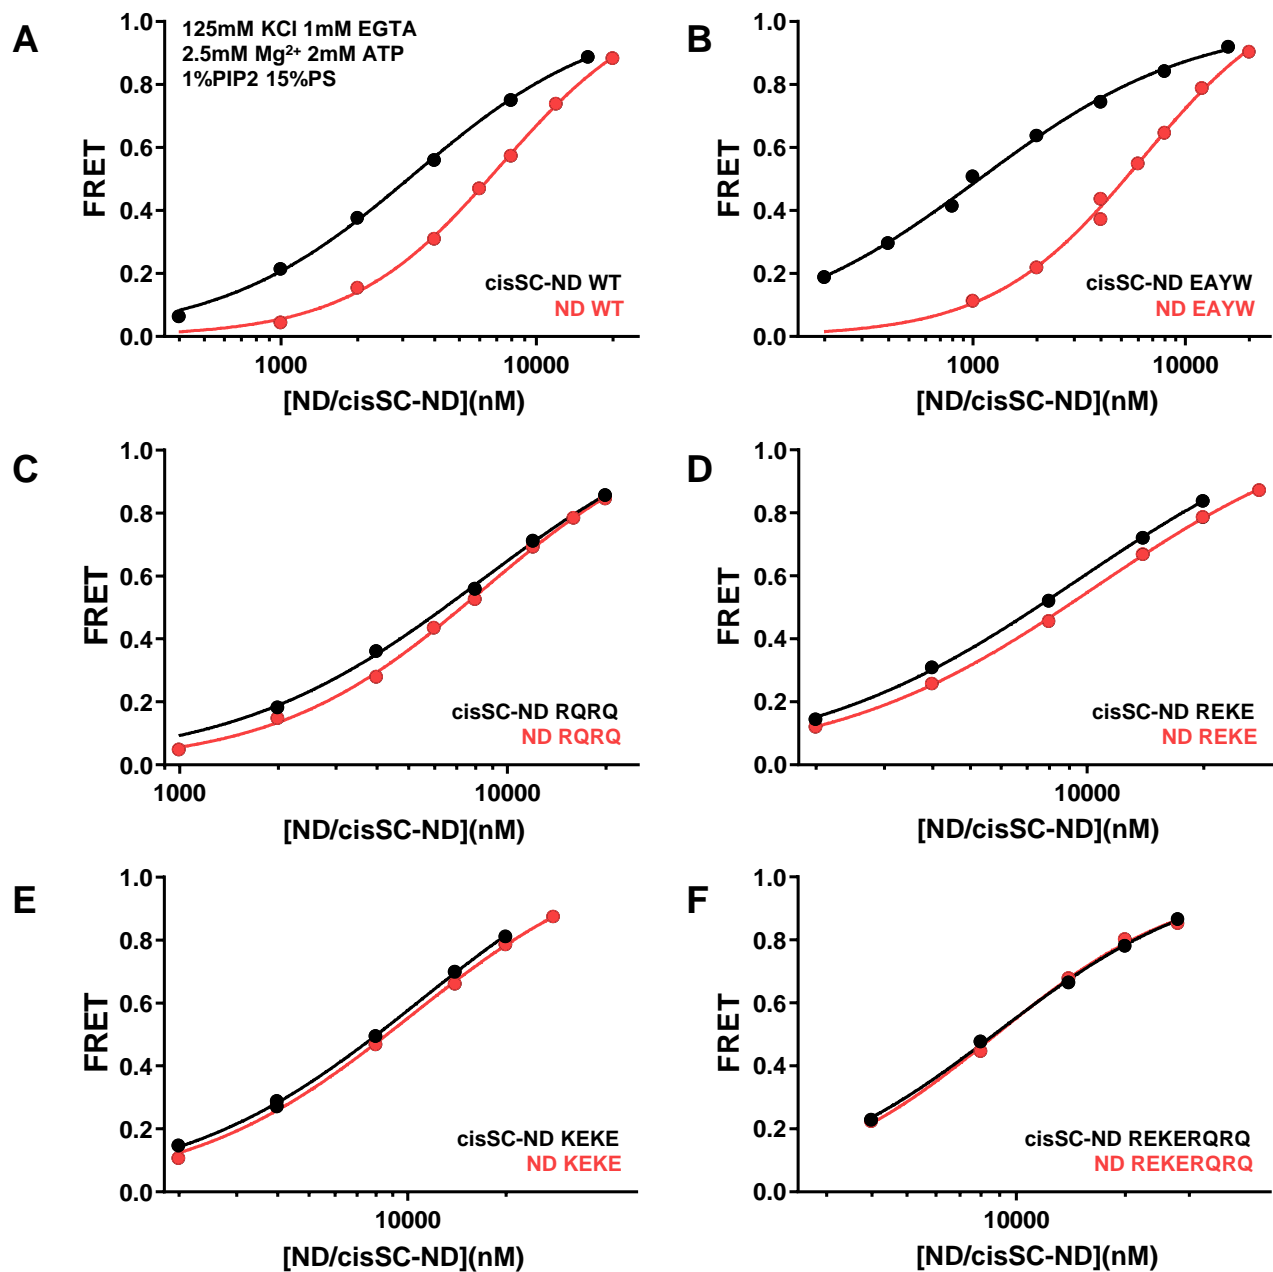

**Figure 9 – S3**  
Voleti, Jaczynska et al.

Supplement: supp [file elife-57154-supp-v1.zip]

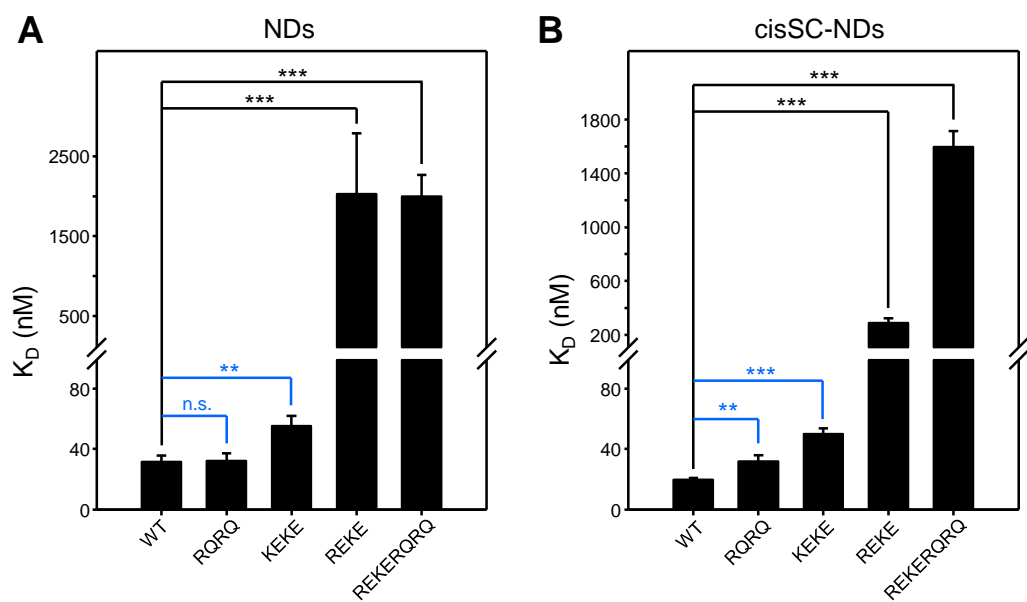

**Figure 9 – S4**  
Voleti, Jaczynska et al.

Supplement: supp [file elife-57154-supp-v1.zip]

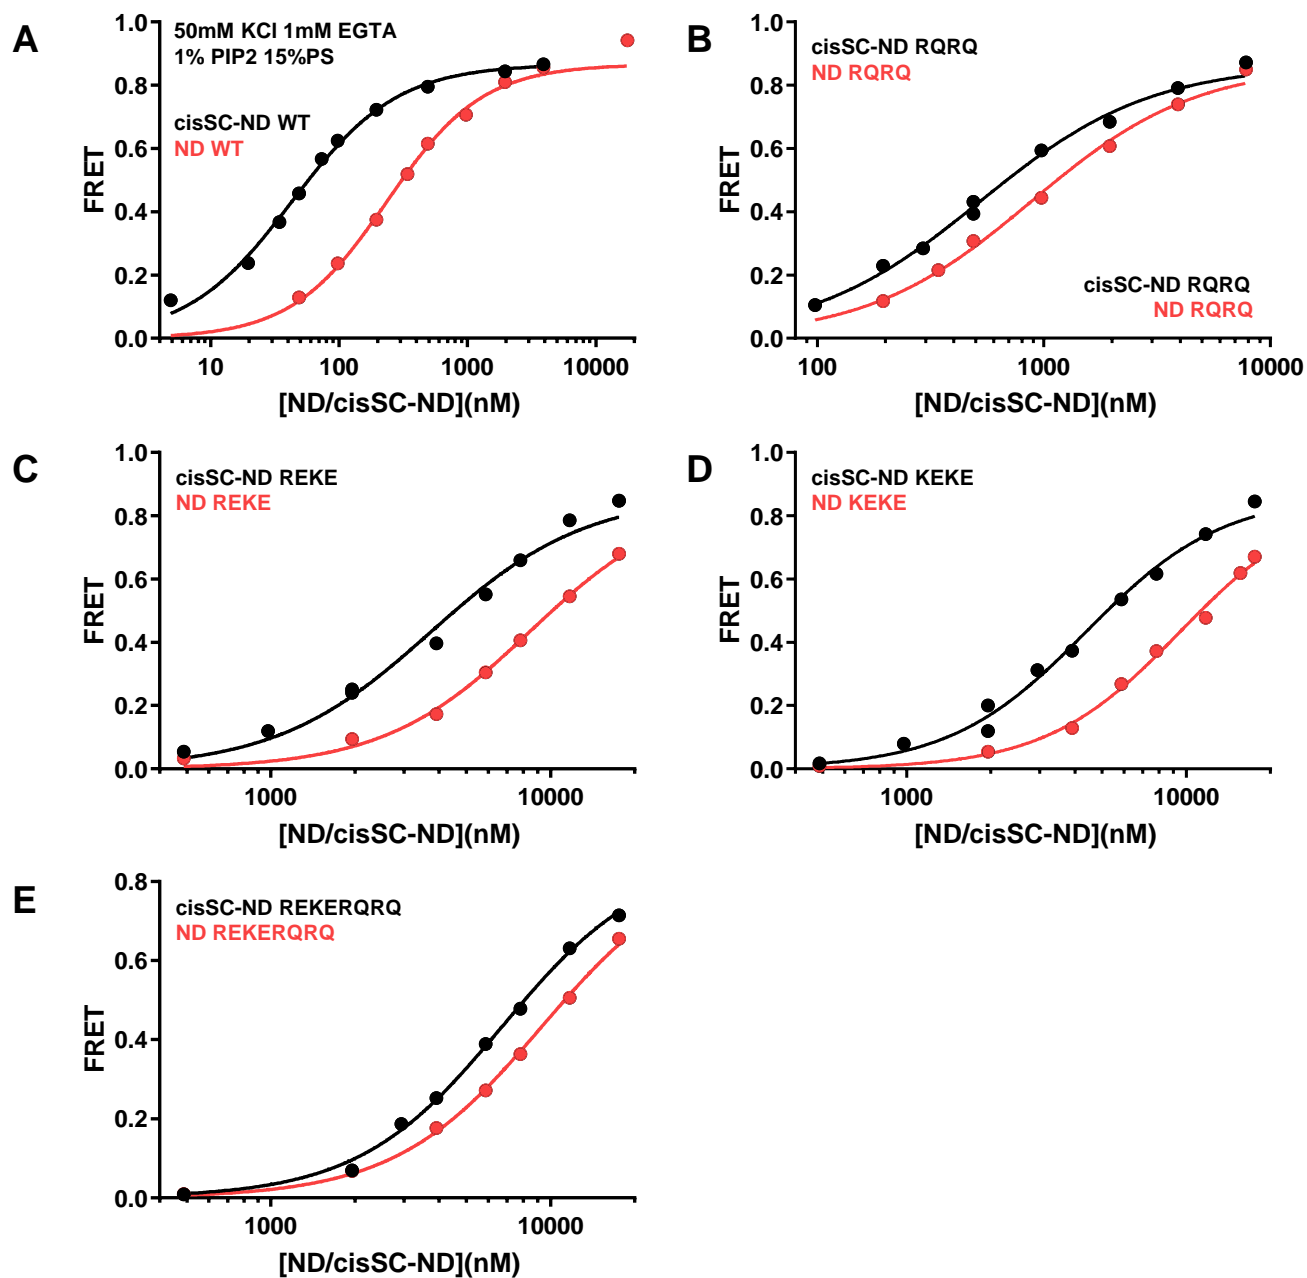

Figure 6 – S2  
 Voleti, Jaczynska et al.

Supplement: supp [file elife-57154-supp-v1.zip]
